# Supplementary material
Source: PubMed Central journal article supplement (PMC6505794)
Supplement: DS2_JVDI_10.1177_1040638718789725.pdf [file DS2_JVDI_10.1177_1040638718789725.pdf]

**Supplementary Table 1.** Comparison of sequencing, matrix-assisted laser desorption/ionization time-of-flight mass spectrometry (MALDI-TOF MS) using custom (UNLVDC) or manufacturer-provided (BDAL) database for spectrum matching, and PCR–restriction-fragment length polymorphism (PCR-RFLP) for identification of *Moraxella bovoculi* and *M. bovis* from ocular or nasopharyngeal sites from cattle with or without infectious bovine keratoconjunctivitis.

| Isolate | State        | Sequencing results* | UNLVDC ID          | UNLVDC top score† | UNLVDC match‡  | BDAL MALDI ID      | BDAL match‡    | PCR-RFLP           | Disease§ | Site of origin |
|---------|--------------|---------------------|--------------------|-------------------|----------------|--------------------|----------------|--------------------|----------|----------------|
| 22581   | Missouri     | <i>M. bovoculi</i>  | <i>M. bovoculi</i> | 2.6               | 23343          | <i>M. bovoculi</i> | DSM 21142T LGL | <i>M. bovis</i>    | Absent   | Nasopharynx    |
| 23343   | Tennessee    | <i>M. bovoculi</i>  | <i>M. bovoculi</i> | 2.6               | 23343          | <i>M. bovoculi</i> | DSM 21142T LGL | <i>M. bovis</i>    | Absent   | Nasopharynx    |
| 28389   | Kentucky     | <i>M. bovoculi</i>  | <i>M. bovoculi</i> | 2.55              | 23343          | <i>M. bovoculi</i> | DSM 21142T LGL | <i>M. bovis</i>    | Absent   | Nasopharynx    |
| 33362   | Kansas       | <i>M. bovoculi</i>  | <i>M. bovoculi</i> | 2.58              | 23343          | <i>M. bovoculi</i> | DSM 21142T LGL | <i>M. bovis</i>    | Absent   | Nasopharynx    |
| 57850   | Nebraska     | <i>M. bovoculi</i>  | <i>M. bovoculi</i> | 2.52              | DSM 21142T LGL | <i>M. bovoculi</i> | DSM 21142T LGL | <i>M. bovoculi</i> | Present  | Ocular         |
| 57851   | Montana      | <i>M. bovoculi</i>  | <i>M. bovoculi</i> | 2.42              | DSM 21142T LGL | <i>M. bovoculi</i> | DSM 21142T LGL | <i>M. bovoculi</i> | Present  | Ocular         |
| 57852   | Nebraska     | <i>M. bovoculi</i>  | <i>M. bovoculi</i> | 2.47              | DSM 21142T LGL | <i>M. bovoculi</i> | DSM 21142T LGL | <i>M. bovoculi</i> | Present  | Swab           |
| 57853   | Nebraska     | <i>M. bovoculi</i>  | <i>M. bovoculi</i> | 2.36              | DSM 21142T LGL | <i>M. bovoculi</i> | DSM 21142T LGL | <i>M. bovoculi</i> | Present  | Ocular         |
| 57854   | Nebraska     | <i>M. bovoculi</i>  | <i>M. bovoculi</i> | 2.31              | DSM 21142T LGL | <i>M. bovoculi</i> | DSM 21142T LGL | <i>M. bovoculi</i> | Present  | Ocular         |
| 57855   | Ohio         | <i>M. bovoculi</i>  | <i>M. bovoculi</i> | 2.36              | DSM 21142T LGL | <i>M. bovoculi</i> | DSM 21142T LGL | <i>M. bovoculi</i> | Present  | Ocular         |
| 57857   | Texas        | <i>M. bovoculi</i>  | <i>M. bovoculi</i> | 2.41              | DSM 21142T LGL | <i>M. bovoculi</i> | DSM 21142T LGL | <i>M. bovoculi</i> | Present  | Ocular         |
| 57858   | Vermont      | <i>M. bovoculi</i>  | <i>M. bovoculi</i> | 2.45              | DSM 21142T LGL | <i>M. bovoculi</i> | DSM 21142T LGL | <i>M. bovoculi</i> | Present  | Ocular         |
| 57860   | Iowa         | <i>M. bovoculi</i>  | <i>M. bovoculi</i> | 2.49              | DSM 21142T LGL | <i>M. bovoculi</i> | DSM 21142T LGL | <i>M. bovoculi</i> | Present  | Ocular         |
| 57861   | South Dakota | <i>M. bovoculi</i>  | <i>M. bovoculi</i> | 2.41              | DSM 21142T LGL | <i>M. bovoculi</i> | DSM 21142T LGL | <i>M. bovoculi</i> | Present  | Ocular         |

| Isolate | State     | Sequencing results* | UNLVDC ID          | UNLVDC top score† | UNLVDC match‡  | BDAL MALDI ID      | BDAL match‡    | PCR-RFLP           | Disease§ | Site of origin |
|---------|-----------|---------------------|--------------------|-------------------|----------------|--------------------|----------------|--------------------|----------|----------------|
| 22581   | Missouri  | <i>M. bovoculi</i>  | <i>M. bovoculi</i> | 2.6               | 23343          | <i>M. bovoculi</i> | DSM 21142T LGL | <i>M. bovis</i>    | Absent   | Nasopharynx    |
| 23343   | Tennessee | <i>M. bovoculi</i>  | <i>M. bovoculi</i> | 2.6               | 23343          | <i>M. bovoculi</i> | DSM 21142T LGL | <i>M. bovis</i>    | Absent   | Nasopharynx    |
| 28389   | Kentucky  | <i>M. bovoculi</i>  | <i>M. bovoculi</i> | 2.55              | 23343          | <i>M. bovoculi</i> | DSM 21142T LGL | <i>M. bovis</i>    | Absent   | Nasopharynx    |
| 33362   | Kansas    | <i>M. bovoculi</i>  | <i>M. bovoculi</i> | 2.58              | 23343          | <i>M. bovoculi</i> | DSM 21142T LGL | <i>M. bovis</i>    | Absent   | Nasopharynx    |
| 57850   | Nebraska  | <i>M. bovoculi</i>  | <i>M. bovoculi</i> | 2.52              | DSM 21142T LGL | <i>M. bovoculi</i> | DSM 21142T LGL | <i>M. bovoculi</i> | Present  | Ocular         |
| 57851   | Montana   | <i>M. bovoculi</i>  | <i>M. bovoculi</i> | 2.42              | DSM 21142T LGL | <i>M. bovoculi</i> | DSM 21142T LGL | <i>M. bovoculi</i> | Present  | Ocular         |
| 57852   | Nebraska  | <i>M. bovoculi</i>  | <i>M. bovoculi</i> | 2.47              | DSM 21142T LGL | <i>M. bovoculi</i> | DSM 21142T LGL | <i>M. bovoculi</i> | Present  | Swab           |
| 57853   | Nebraska  | <i>M. bovoculi</i>  | <i>M. bovoculi</i> | 2.36              | DSM 21142T LGL | <i>M. bovoculi</i> | DSM 21142T LGL | <i>M. bovoculi</i> | Present  | Ocular         |
| 57854   | Nebraska  | <i>M. bovoculi</i>  | <i>M. bovoculi</i> | 2.31              | DSM 21142T LGL | <i>M. bovoculi</i> | DSM 21142T LGL | <i>M. bovoculi</i> | Present  | Ocular         |
| 57855   | Ohio      | <i>M. bovoculi</i>  | <i>M. bovoculi</i> | 2.36              | DSM 21142T LGL | <i>M. bovoculi</i> | DSM 21142T LGL | <i>M. bovoculi</i> | Present  | Ocular         |
| 57857   | Texas     | <i>M. bovoculi</i>  | <i>M. bovoculi</i> | 2.41              | DSM 21142T LGL | <i>M. bovoculi</i> | DSM 21142T LGL | <i>M. bovoculi</i> | Present  | Ocular         |
| 57862   | Nebraska  | <i>M. bovoculi</i>  | <i>M. bovoculi</i> | 2.49              | DSM 21142T LGL | <i>M. bovoculi</i> | DSM 21142T LGL | <i>M. bovoculi</i> | Present  | Ocular         |
| 57863   | Indiana   | <i>M. bovoculi</i>  | <i>M. bovoculi</i> | 2.41              | DSM 21142T LGL | <i>M. bovoculi</i> | DSM 21142T LGL | <i>M. bovoculi</i> | Present  | Ocular         |
| 57864   | Nebraska  | <i>M. bovoculi</i>  | <i>M. bovoculi</i> | 2.51              | DSM 21142T LGL | <i>M. bovoculi</i> | DSM 21142T LGL | <i>M. bovoculi</i> | Present  | Ocular         |
| 57865   | Nebraska  | <i>M. bovoculi</i>  | <i>M. bovoculi</i> | 2.29              | DSM 21142T LGL | <i>M. bovoculi</i> | DSM 21142T LGL | <i>M. bovoculi</i> | Present  | Ocular         |
| 57866   | Nebraska  | <i>M. bovoculi</i>  | <i>M. bovoculi</i> | 2.54              | DSM 21142T LGL | <i>M. bovoculi</i> | DSM 21142T LGL | <i>M. bovoculi</i> | Present  | Ocular         |
| 57867   | Nebraska  | <i>M. bovoculi</i>  | <i>M. bovoculi</i> | 2.33              | DSM 21142T LGL | <i>M. bovoculi</i> | DSM 21142T LGL | <i>M. bovoculi</i> | Present  | Ocular         |
| 57869   | Nebraska  | <i>M. bovoculi</i>  | <i>M. bovoculi</i> | 2.36              | DSM 21142T LGL | <i>M. bovoculi</i> | DSM 21142T LGL | <i>M. bovoculi</i> | Present  | Ocular         |
| 57870   | Nebraska  | <i>M. bovoculi</i>  | <i>M. bovoculi</i> | 2.53              | DSM 21142T LGL | <i>M. bovoculi</i> | DSM 21142T LGL | <i>M. bovoculi</i> | Present  | Ocular         |

| Isolate | State     | Sequencing results* | UNLVDC ID          | UNLVDC top score† | UNLVDC match‡  | BDAL MALDI ID      | BDAL match‡    | PCR-RFLP           | Disease§ | Site of origin |
|---------|-----------|---------------------|--------------------|-------------------|----------------|--------------------|----------------|--------------------|----------|----------------|
| 22581   | Missouri  | <i>M. bovoculi</i>  | <i>M. bovoculi</i> | 2.6               | 23343          | <i>M. bovoculi</i> | DSM 21142T LGL | <i>M. bovis</i>    | Absent   | Nasopharynx    |
| 23343   | Tennessee | <i>M. bovoculi</i>  | <i>M. bovoculi</i> | 2.6               | 23343          | <i>M. bovoculi</i> | DSM 21142T LGL | <i>M. bovis</i>    | Absent   | Nasopharynx    |
| 28389   | Kentucky  | <i>M. bovoculi</i>  | <i>M. bovoculi</i> | 2.55              | 23343          | <i>M. bovoculi</i> | DSM 21142T LGL | <i>M. bovis</i>    | Absent   | Nasopharynx    |
| 33362   | Kansas    | <i>M. bovoculi</i>  | <i>M. bovoculi</i> | 2.58              | 23343          | <i>M. bovoculi</i> | DSM 21142T LGL | <i>M. bovis</i>    | Absent   | Nasopharynx    |
| 57850   | Nebraska  | <i>M. bovoculi</i>  | <i>M. bovoculi</i> | 2.52              | DSM 21142T LGL | <i>M. bovoculi</i> | DSM 21142T LGL | <i>M. bovoculi</i> | Present  | Ocular         |
| 57851   | Montana   | <i>M. bovoculi</i>  | <i>M. bovoculi</i> | 2.42              | DSM 21142T LGL | <i>M. bovoculi</i> | DSM 21142T LGL | <i>M. bovoculi</i> | Present  | Ocular         |
| 57852   | Nebraska  | <i>M. bovoculi</i>  | <i>M. bovoculi</i> | 2.47              | DSM 21142T LGL | <i>M. bovoculi</i> | DSM 21142T LGL | <i>M. bovoculi</i> | Present  | Swab           |
| 57853   | Nebraska  | <i>M. bovoculi</i>  | <i>M. bovoculi</i> | 2.36              | DSM 21142T LGL | <i>M. bovoculi</i> | DSM 21142T LGL | <i>M. bovoculi</i> | Present  | Ocular         |
| 57854   | Nebraska  | <i>M. bovoculi</i>  | <i>M. bovoculi</i> | 2.31              | DSM 21142T LGL | <i>M. bovoculi</i> | DSM 21142T LGL | <i>M. bovoculi</i> | Present  | Ocular         |
| 57855   | Ohio      | <i>M. bovoculi</i>  | <i>M. bovoculi</i> | 2.36              | DSM 21142T LGL | <i>M. bovoculi</i> | DSM 21142T LGL | <i>M. bovoculi</i> | Present  | Ocular         |
| 57857   | Texas     | <i>M. bovoculi</i>  | <i>M. bovoculi</i> | 2.41              | DSM 21142T LGL | <i>M. bovoculi</i> | DSM 21142T LGL | <i>M. bovoculi</i> | Present  | Ocular         |
| 57871   | Nebraska  | <i>M. bovoculi</i>  | <i>M. bovoculi</i> | 2.55              | DSM 21142T LGL | <i>M. bovoculi</i> | DSM 21142T LGL | <i>M. bovoculi</i> | Present  | Ocular         |
| 57872   | Nebraska  | <i>M. bovoculi</i>  | <i>M. bovoculi</i> | 2.45              | DSM 21142T LGL | <i>M. bovoculi</i> | DSM 21142T LGL | <i>M. bovoculi</i> | Present  | Ocular         |
| 57873   | Nebraska  | <i>M. bovoculi</i>  | <i>M. bovoculi</i> | 2.45              | DSM 21142T LGL | <i>M. bovoculi</i> | DSM 21142T LGL | <i>M. bovoculi</i> | Present  | Ocular         |
| 57874   | Nebraska  | <i>M. bovoculi</i>  | <i>M. bovoculi</i> | 2.44              | DSM 21142T LGL | <i>M. bovoculi</i> | DSM 21142T LGL | <i>M. bovoculi</i> | Present  | Ocular         |
| 57875   | Nebraska  | <i>M. bovoculi</i>  | <i>M. bovoculi</i> | 2.46              | DSM 21142T LGL | <i>M. bovoculi</i> | DSM 21142T LGL | <i>M. bovoculi</i> | Present  | Ocular         |
| 57876   | Nebraska  | <i>M. bovoculi</i>  | <i>M. bovoculi</i> | 2.49              | DSM 21142T LGL | <i>M. bovoculi</i> | DSM 21142T LGL | <i>M. bovoculi</i> | Present  | Ocular         |
| 57877   | Nebraska  | <i>M. bovoculi</i>  | <i>M. bovoculi</i> | 2.55              | DSM 21142T LGL | <i>M. bovoculi</i> | DSM 21142T LGL | <i>M. bovoculi</i> | Present  | Ocular         |
| 57878   | Nebraska  | <i>M. bovoculi</i>  | <i>M. bovoculi</i> | 2.47              | DSM 21142T LGL | <i>M. bovoculi</i> | DSM 21142T LGL | <i>M. bovoculi</i> | Present  | Ocular         |

| Isolate | State     | Sequencing results* | UNLVDC ID          | UNLVDC top score† | UNLVDC match‡  | BDAL MALDI ID      | BDAL match‡    | PCR-RFLP           | Disease§ | Site of origin |
|---------|-----------|---------------------|--------------------|-------------------|----------------|--------------------|----------------|--------------------|----------|----------------|
| 22581   | Missouri  | <i>M. bovoculi</i>  | <i>M. bovoculi</i> | 2.6               | 23343          | <i>M. bovoculi</i> | DSM 21142T LGL | <i>M. bovis</i>    | Absent   | Nasopharynx    |
| 23343   | Tennessee | <i>M. bovoculi</i>  | <i>M. bovoculi</i> | 2.6               | 23343          | <i>M. bovoculi</i> | DSM 21142T LGL | <i>M. bovis</i>    | Absent   | Nasopharynx    |
| 28389   | Kentucky  | <i>M. bovoculi</i>  | <i>M. bovoculi</i> | 2.55              | 23343          | <i>M. bovoculi</i> | DSM 21142T LGL | <i>M. bovis</i>    | Absent   | Nasopharynx    |
| 33362   | Kansas    | <i>M. bovoculi</i>  | <i>M. bovoculi</i> | 2.58              | 23343          | <i>M. bovoculi</i> | DSM 21142T LGL | <i>M. bovis</i>    | Absent   | Nasopharynx    |
| 57850   | Nebraska  | <i>M. bovoculi</i>  | <i>M. bovoculi</i> | 2.52              | DSM 21142T LGL | <i>M. bovoculi</i> | DSM 21142T LGL | <i>M. bovoculi</i> | Present  | Ocular         |
| 57851   | Montana   | <i>M. bovoculi</i>  | <i>M. bovoculi</i> | 2.42              | DSM 21142T LGL | <i>M. bovoculi</i> | DSM 21142T LGL | <i>M. bovoculi</i> | Present  | Ocular         |
| 57852   | Nebraska  | <i>M. bovoculi</i>  | <i>M. bovoculi</i> | 2.47              | DSM 21142T LGL | <i>M. bovoculi</i> | DSM 21142T LGL | <i>M. bovoculi</i> | Present  | Swab           |
| 57853   | Nebraska  | <i>M. bovoculi</i>  | <i>M. bovoculi</i> | 2.36              | DSM 21142T LGL | <i>M. bovoculi</i> | DSM 21142T LGL | <i>M. bovoculi</i> | Present  | Ocular         |
| 57854   | Nebraska  | <i>M. bovoculi</i>  | <i>M. bovoculi</i> | 2.31              | DSM 21142T LGL | <i>M. bovoculi</i> | DSM 21142T LGL | <i>M. bovoculi</i> | Present  | Ocular         |
| 57855   | Ohio      | <i>M. bovoculi</i>  | <i>M. bovoculi</i> | 2.36              | DSM 21142T LGL | <i>M. bovoculi</i> | DSM 21142T LGL | <i>M. bovoculi</i> | Present  | Ocular         |
| 57857   | Texas     | <i>M. bovoculi</i>  | <i>M. bovoculi</i> | 2.41              | DSM 21142T LGL | <i>M. bovoculi</i> | DSM 21142T LGL | <i>M. bovoculi</i> | Present  | Ocular         |
| 57879   | Oklahoma  | <i>M. bovoculi</i>  | <i>M. bovoculi</i> | 2.5               | DSM 21142T LGL | <i>M. bovoculi</i> | DSM 21142T LGL | <i>M. bovoculi</i> | Present  | Ocular         |
| 57880   | Nebraska  | <i>M. bovoculi</i>  | <i>M. bovoculi</i> | 2.45              | DSM 21142T LGL | <i>M. bovoculi</i> | DSM 21142T LGL | <i>M. bovoculi</i> | Present  | Ocular         |
| 57881   | Nebraska  | <i>M. bovoculi</i>  | <i>M. bovoculi</i> | 2.34              | DSM 21142T LGL | <i>M. bovoculi</i> | DSM 21142T LGL | <i>M. bovoculi</i> | Present  | Ocular         |
| 57882   | Nebraska  | <i>M. bovoculi</i>  | <i>M. bovoculi</i> | 2.54              | DSM 21142T LGL | <i>M. bovoculi</i> | DSM 21142T LGL | <i>M. bovoculi</i> | Present  | Ocular         |
| 57883   | Nebraska  | <i>M. bovoculi</i>  | <i>M. bovoculi</i> | 2.34              | DSM 21142T LGL | <i>M. bovoculi</i> | DSM 21142T LGL | <i>M. bovoculi</i> | Present  | Ocular         |
| 57884   | Indiana   | <i>M. bovoculi</i>  | <i>M. bovoculi</i> | 2.39              | DSM 21142T LGL | <i>M. bovoculi</i> | DSM 21142T LGL | <i>M. bovoculi</i> | Present  | Ocular         |
| 57885   | Kansas    | <i>M. bovoculi</i>  | <i>M. bovoculi</i> | 2.48              | DSM 21142T LGL | <i>M. bovoculi</i> | DSM 21142T LGL | <i>M. bovoculi</i> | Present  | Ocular         |
| 57886   | Wisconsin | <i>M. bovoculi</i>  | <i>M. bovoculi</i> | 2.48              | DSM 21142T LGL | <i>M. bovoculi</i> | DSM 21142T LGL | <i>M. bovoculi</i> | Present  | Ocular         |

| Isolate | State     | Sequencing results* | UNLVDC ID          | UNLVDC top score† | UNLVDC match‡  | BDAL MALDI ID      | BDAL match‡    | PCR-RFLP           | Disease§ | Site of origin |
|---------|-----------|---------------------|--------------------|-------------------|----------------|--------------------|----------------|--------------------|----------|----------------|
| 22581   | Missouri  | <i>M. bovoculi</i>  | <i>M. bovoculi</i> | 2.6               | 23343          | <i>M. bovoculi</i> | DSM 21142T LGL | <i>M. bovis</i>    | Absent   | Nasopharynx    |
| 23343   | Tennessee | <i>M. bovoculi</i>  | <i>M. bovoculi</i> | 2.6               | 23343          | <i>M. bovoculi</i> | DSM 21142T LGL | <i>M. bovis</i>    | Absent   | Nasopharynx    |
| 28389   | Kentucky  | <i>M. bovoculi</i>  | <i>M. bovoculi</i> | 2.55              | 23343          | <i>M. bovoculi</i> | DSM 21142T LGL | <i>M. bovis</i>    | Absent   | Nasopharynx    |
| 33362   | Kansas    | <i>M. bovoculi</i>  | <i>M. bovoculi</i> | 2.58              | 23343          | <i>M. bovoculi</i> | DSM 21142T LGL | <i>M. bovis</i>    | Absent   | Nasopharynx    |
| 57850   | Nebraska  | <i>M. bovoculi</i>  | <i>M. bovoculi</i> | 2.52              | DSM 21142T LGL | <i>M. bovoculi</i> | DSM 21142T LGL | <i>M. bovoculi</i> | Present  | Ocular         |
| 57851   | Montana   | <i>M. bovoculi</i>  | <i>M. bovoculi</i> | 2.42              | DSM 21142T LGL | <i>M. bovoculi</i> | DSM 21142T LGL | <i>M. bovoculi</i> | Present  | Ocular         |
| 57852   | Nebraska  | <i>M. bovoculi</i>  | <i>M. bovoculi</i> | 2.47              | DSM 21142T LGL | <i>M. bovoculi</i> | DSM 21142T LGL | <i>M. bovoculi</i> | Present  | Swab           |
| 57853   | Nebraska  | <i>M. bovoculi</i>  | <i>M. bovoculi</i> | 2.36              | DSM 21142T LGL | <i>M. bovoculi</i> | DSM 21142T LGL | <i>M. bovoculi</i> | Present  | Ocular         |
| 57854   | Nebraska  | <i>M. bovoculi</i>  | <i>M. bovoculi</i> | 2.31              | DSM 21142T LGL | <i>M. bovoculi</i> | DSM 21142T LGL | <i>M. bovoculi</i> | Present  | Ocular         |
| 57855   | Ohio      | <i>M. bovoculi</i>  | <i>M. bovoculi</i> | 2.36              | DSM 21142T LGL | <i>M. bovoculi</i> | DSM 21142T LGL | <i>M. bovoculi</i> | Present  | Ocular         |
| 57857   | Texas     | <i>M. bovoculi</i>  | <i>M. bovoculi</i> | 2.41              | DSM 21142T LGL | <i>M. bovoculi</i> | DSM 21142T LGL | <i>M. bovoculi</i> | Present  | Ocular         |
| 57887   | Wisconsin | <i>M. bovoculi</i>  | <i>M. bovoculi</i> | 2.4               | DSM 21142T LGL | <i>M. bovoculi</i> | DSM 21142T LGL | <i>M. bovoculi</i> | Present  | Ocular         |
| 57888   | Nebraska  | <i>M. bovoculi</i>  | <i>M. bovoculi</i> | 2.41              | DSM 21142T LGL | <i>M. bovoculi</i> | DSM 21142T LGL | <i>M. bovoculi</i> | Present  | Ocular         |
| 57889   | Nebraska  | <i>M. bovoculi</i>  | <i>M. bovoculi</i> | 2.45              | DSM 21142T LGL | <i>M. bovoculi</i> | DSM 21142T LGL | <i>M. bovoculi</i> | Present  | Ocular         |
| 57890   | Vermont   | <i>M. bovoculi</i>  | <i>M. bovoculi</i> | 2.43              | DSM 21142T LGL | <i>M. bovoculi</i> | DSM 21142T LGL | <i>M. bovoculi</i> | Present  | Ocular         |
| 57891   | Wisconsin | <i>M. bovoculi</i>  | <i>M. bovoculi</i> | 2.49              | DSM 21142T LGL | <i>M. bovoculi</i> | DSM 21142T LGL | <i>M. bovoculi</i> | Present  | Ocular         |
| 57892   | Indiana   | <i>M. bovoculi</i>  | <i>M. bovoculi</i> | 2.47              | DSM 21142T LGL | <i>M. bovoculi</i> | DSM 21142T LGL | <i>M. bovoculi</i> | Present  | Ocular         |
| 57893   | Iowa      | <i>M. bovoculi</i>  | <i>M. bovoculi</i> | 2.57              | DSM 21142T LGL | <i>M. bovoculi</i> | DSM 21142T LGL | <i>M. bovoculi</i> | Present  | Ocular         |
| 57894   | Kansas    | <i>M. bovoculi</i>  | <i>M. bovoculi</i> | 2.51              | DSM 21142T LGL | <i>M. bovoculi</i> | DSM 21142T LGL | <i>M. bovoculi</i> | Present  | Ocular         |

| Isolate | State     | Sequencing results* | UNLVDC ID          | UNLVDC top score† | UNLVDC match‡  | BDAL MALDI ID      | BDAL match‡    | PCR-RFLP           | Disease§ | Site of origin |
|---------|-----------|---------------------|--------------------|-------------------|----------------|--------------------|----------------|--------------------|----------|----------------|
| 22581   | Missouri  | <i>M. bovoculi</i>  | <i>M. bovoculi</i> | 2.6               | 23343          | <i>M. bovoculi</i> | DSM 21142T LGL | <i>M. bovis</i>    | Absent   | Nasopharynx    |
| 23343   | Tennessee | <i>M. bovoculi</i>  | <i>M. bovoculi</i> | 2.6               | 23343          | <i>M. bovoculi</i> | DSM 21142T LGL | <i>M. bovis</i>    | Absent   | Nasopharynx    |
| 28389   | Kentucky  | <i>M. bovoculi</i>  | <i>M. bovoculi</i> | 2.55              | 23343          | <i>M. bovoculi</i> | DSM 21142T LGL | <i>M. bovis</i>    | Absent   | Nasopharynx    |
| 33362   | Kansas    | <i>M. bovoculi</i>  | <i>M. bovoculi</i> | 2.58              | 23343          | <i>M. bovoculi</i> | DSM 21142T LGL | <i>M. bovis</i>    | Absent   | Nasopharynx    |
| 57850   | Nebraska  | <i>M. bovoculi</i>  | <i>M. bovoculi</i> | 2.52              | DSM 21142T LGL | <i>M. bovoculi</i> | DSM 21142T LGL | <i>M. bovoculi</i> | Present  | Ocular         |
| 57851   | Montana   | <i>M. bovoculi</i>  | <i>M. bovoculi</i> | 2.42              | DSM 21142T LGL | <i>M. bovoculi</i> | DSM 21142T LGL | <i>M. bovoculi</i> | Present  | Ocular         |
| 57852   | Nebraska  | <i>M. bovoculi</i>  | <i>M. bovoculi</i> | 2.47              | DSM 21142T LGL | <i>M. bovoculi</i> | DSM 21142T LGL | <i>M. bovoculi</i> | Present  | Swab           |
| 57853   | Nebraska  | <i>M. bovoculi</i>  | <i>M. bovoculi</i> | 2.36              | DSM 21142T LGL | <i>M. bovoculi</i> | DSM 21142T LGL | <i>M. bovoculi</i> | Present  | Ocular         |
| 57854   | Nebraska  | <i>M. bovoculi</i>  | <i>M. bovoculi</i> | 2.31              | DSM 21142T LGL | <i>M. bovoculi</i> | DSM 21142T LGL | <i>M. bovoculi</i> | Present  | Ocular         |
| 57855   | Ohio      | <i>M. bovoculi</i>  | <i>M. bovoculi</i> | 2.36              | DSM 21142T LGL | <i>M. bovoculi</i> | DSM 21142T LGL | <i>M. bovoculi</i> | Present  | Ocular         |
| 57857   | Texas     | <i>M. bovoculi</i>  | <i>M. bovoculi</i> | 2.41              | DSM 21142T LGL | <i>M. bovoculi</i> | DSM 21142T LGL | <i>M. bovoculi</i> | Present  | Ocular         |
| 57895   | Nebraska  | <i>M. bovoculi</i>  | <i>M. bovoculi</i> | 2.54              | DSM 21142T LGL | <i>M. bovoculi</i> | DSM 21142T LGL | <i>M. bovoculi</i> | Present  | Ocular         |
| 57896   | Nebraska  | <i>M. bovoculi</i>  | <i>M. bovoculi</i> | 2.55              | DSM 21142T LGL | <i>M. bovoculi</i> | DSM 21142T LGL | <i>M. bovoculi</i> | Present  | Ocular         |
| 57897   | Nebraska  | <i>M. bovoculi</i>  | <i>M. bovoculi</i> | 2.52              | DSM 21142T LGL | <i>M. bovoculi</i> | DSM 21142T LGL | <i>M. bovoculi</i> | Present  | Ocular         |
| 57898   | Nebraska  | <i>M. bovoculi</i>  | <i>M. bovoculi</i> | 2.39              | DSM 21142T LGL | <i>M. bovoculi</i> | DSM 21142T LGL | <i>M. bovoculi</i> | Present  | Ocular         |
| 57899   | Nebraska  | <i>M. bovoculi</i>  | <i>M. bovoculi</i> | 2.48              | DSM 21142T LGL | <i>M. bovoculi</i> | DSM 21142T LGL | <i>M. bovoculi</i> | Present  | Ocular         |
| 57900   | Nebraska  | <i>M. bovoculi</i>  | <i>M. bovoculi</i> | 2.5               | DSM 21142T LGL | <i>M. bovoculi</i> | DSM 21142T LGL | <i>M. bovoculi</i> | Present  | Ocular         |
| 57901   | Nebraska  | <i>M. bovoculi</i>  | <i>M. bovoculi</i> | 2.37              | DSM 21142T LGL | <i>M. bovoculi</i> | DSM 21142T LGL | <i>M. bovoculi</i> | Present  | Ocular         |
| 57902   | Nebraska  | <i>M. bovoculi</i>  | <i>M. bovoculi</i> | 2.48              | DSM 21142T LGL | <i>M. bovoculi</i> | DSM 21142T LGL | <i>M. bovoculi</i> | Present  | Ocular         |

| Isolate | State      | Sequencing results* | UNLVDC ID          | UNLVDC top score† | UNLVDC match‡  | BDAL MALDI ID      | BDAL match‡    | PCR-RFLP           | Disease§ | Site of origin |
|---------|------------|---------------------|--------------------|-------------------|----------------|--------------------|----------------|--------------------|----------|----------------|
| 22581   | Missouri   | <i>M. bovoculi</i>  | <i>M. bovoculi</i> | 2.6               | 23343          | <i>M. bovoculi</i> | DSM 21142T LGL | <i>M. bovis</i>    | Absent   | Nasopharynx    |
| 23343   | Tennessee  | <i>M. bovoculi</i>  | <i>M. bovoculi</i> | 2.6               | 23343          | <i>M. bovoculi</i> | DSM 21142T LGL | <i>M. bovis</i>    | Absent   | Nasopharynx    |
| 28389   | Kentucky   | <i>M. bovoculi</i>  | <i>M. bovoculi</i> | 2.55              | 23343          | <i>M. bovoculi</i> | DSM 21142T LGL | <i>M. bovis</i>    | Absent   | Nasopharynx    |
| 33362   | Kansas     | <i>M. bovoculi</i>  | <i>M. bovoculi</i> | 2.58              | 23343          | <i>M. bovoculi</i> | DSM 21142T LGL | <i>M. bovis</i>    | Absent   | Nasopharynx    |
| 57850   | Nebraska   | <i>M. bovoculi</i>  | <i>M. bovoculi</i> | 2.52              | DSM 21142T LGL | <i>M. bovoculi</i> | DSM 21142T LGL | <i>M. bovoculi</i> | Present  | Ocular         |
| 57851   | Montana    | <i>M. bovoculi</i>  | <i>M. bovoculi</i> | 2.42              | DSM 21142T LGL | <i>M. bovoculi</i> | DSM 21142T LGL | <i>M. bovoculi</i> | Present  | Ocular         |
| 57852   | Nebraska   | <i>M. bovoculi</i>  | <i>M. bovoculi</i> | 2.47              | DSM 21142T LGL | <i>M. bovoculi</i> | DSM 21142T LGL | <i>M. bovoculi</i> | Present  | Swab           |
| 57853   | Nebraska   | <i>M. bovoculi</i>  | <i>M. bovoculi</i> | 2.36              | DSM 21142T LGL | <i>M. bovoculi</i> | DSM 21142T LGL | <i>M. bovoculi</i> | Present  | Ocular         |
| 57854   | Nebraska   | <i>M. bovoculi</i>  | <i>M. bovoculi</i> | 2.31              | DSM 21142T LGL | <i>M. bovoculi</i> | DSM 21142T LGL | <i>M. bovoculi</i> | Present  | Ocular         |
| 57855   | Ohio       | <i>M. bovoculi</i>  | <i>M. bovoculi</i> | 2.36              | DSM 21142T LGL | <i>M. bovoculi</i> | DSM 21142T LGL | <i>M. bovoculi</i> | Present  | Ocular         |
| 57857   | Texas      | <i>M. bovoculi</i>  | <i>M. bovoculi</i> | 2.41              | DSM 21142T LGL | <i>M. bovoculi</i> | DSM 21142T LGL | <i>M. bovoculi</i> | Present  | Ocular         |
| 57903   | California | <i>M. bovoculi</i>  | <i>M. bovoculi</i> | 2.57              | DSM 21142T LGL | <i>M. bovoculi</i> | DSM 21142T LGL | <i>M. bovoculi</i> | Present  | Ocular         |
| 57904   | California | <i>M. bovoculi</i>  | <i>M. bovoculi</i> | 2.48              | DSM 21142T LGL | <i>M. bovoculi</i> | DSM 21142T LGL | <i>M. bovoculi</i> | Present  | Ocular         |
| 57905   | Iowa       | <i>M. bovoculi</i>  | <i>M. bovoculi</i> | 2.42              | DSM 21142T LGL | <i>M. bovoculi</i> | DSM 21142T LGL | <i>M. bovoculi</i> | Present  | Ocular         |
| 57906   | Montana    | <i>M. bovoculi</i>  | <i>M. bovoculi</i> | 2.53              | DSM 21142T LGL | <i>M. bovoculi</i> | DSM 21142T LGL | <i>M. bovoculi</i> | Present  | Ocular         |
| 57907   | Nebraska   | <i>M. bovoculi</i>  | <i>M. bovoculi</i> | 2.45              | DSM 21142T LGL | <i>M. bovoculi</i> | DSM 21142T LGL | <i>M. bovoculi</i> | Present  | Ocular         |
| 57908   | Nebraska   | <i>M. bovoculi</i>  | <i>M. bovoculi</i> | 2.52              | DSM 21142T LGL | <i>M. bovoculi</i> | DSM 21142T LGL | <i>M. bovoculi</i> | Present  | Ocular         |
| 57909   | Nebraska   | <i>M. bovoculi</i>  | <i>M. bovoculi</i> | 2.47              | DSM 21142T LGL | <i>M. bovoculi</i> | DSM 21142T LGL | <i>M. bovoculi</i> | Present  | Ocular         |
| 57910   | Nebraska   | <i>M. bovoculi</i>  | <i>M. bovoculi</i> | 2.47              | DSM 21142T LGL | <i>M. bovoculi</i> | DSM 21142T LGL | <i>M. bovoculi</i> | Present  | Ocular         |

| Isolate | State        | Sequencing results* | UNLVDC ID          | UNLVDC top score† | UNLVDC match‡  | BDAL MALDI ID      | BDAL match‡    | PCR-RFLP           | Disease§ | Site of origin |
|---------|--------------|---------------------|--------------------|-------------------|----------------|--------------------|----------------|--------------------|----------|----------------|
| 22581   | Missouri     | <i>M. bovoculi</i>  | <i>M. bovoculi</i> | 2.6               | 23343          | <i>M. bovoculi</i> | DSM 21142T LGL | <i>M. bovis</i>    | Absent   | Nasopharynx    |
| 23343   | Tennessee    | <i>M. bovoculi</i>  | <i>M. bovoculi</i> | 2.6               | 23343          | <i>M. bovoculi</i> | DSM 21142T LGL | <i>M. bovis</i>    | Absent   | Nasopharynx    |
| 28389   | Kentucky     | <i>M. bovoculi</i>  | <i>M. bovoculi</i> | 2.55              | 23343          | <i>M. bovoculi</i> | DSM 21142T LGL | <i>M. bovis</i>    | Absent   | Nasopharynx    |
| 33362   | Kansas       | <i>M. bovoculi</i>  | <i>M. bovoculi</i> | 2.58              | 23343          | <i>M. bovoculi</i> | DSM 21142T LGL | <i>M. bovis</i>    | Absent   | Nasopharynx    |
| 57850   | Nebraska     | <i>M. bovoculi</i>  | <i>M. bovoculi</i> | 2.52              | DSM 21142T LGL | <i>M. bovoculi</i> | DSM 21142T LGL | <i>M. bovoculi</i> | Present  | Ocular         |
| 57851   | Montana      | <i>M. bovoculi</i>  | <i>M. bovoculi</i> | 2.42              | DSM 21142T LGL | <i>M. bovoculi</i> | DSM 21142T LGL | <i>M. bovoculi</i> | Present  | Ocular         |
| 57852   | Nebraska     | <i>M. bovoculi</i>  | <i>M. bovoculi</i> | 2.47              | DSM 21142T LGL | <i>M. bovoculi</i> | DSM 21142T LGL | <i>M. bovoculi</i> | Present  | Swab           |
| 57853   | Nebraska     | <i>M. bovoculi</i>  | <i>M. bovoculi</i> | 2.36              | DSM 21142T LGL | <i>M. bovoculi</i> | DSM 21142T LGL | <i>M. bovoculi</i> | Present  | Ocular         |
| 57854   | Nebraska     | <i>M. bovoculi</i>  | <i>M. bovoculi</i> | 2.31              | DSM 21142T LGL | <i>M. bovoculi</i> | DSM 21142T LGL | <i>M. bovoculi</i> | Present  | Ocular         |
| 57855   | Ohio         | <i>M. bovoculi</i>  | <i>M. bovoculi</i> | 2.36              | DSM 21142T LGL | <i>M. bovoculi</i> | DSM 21142T LGL | <i>M. bovoculi</i> | Present  | Ocular         |
| 57857   | Texas        | <i>M. bovoculi</i>  | <i>M. bovoculi</i> | 2.41              | DSM 21142T LGL | <i>M. bovoculi</i> | DSM 21142T LGL | <i>M. bovoculi</i> | Present  | Ocular         |
| 57911   | Nebraska     | <i>M. bovoculi</i>  | <i>M. bovoculi</i> | 2.47              | DSM 21142T LGL | <i>M. bovoculi</i> | DSM 21142T LGL | <i>M. bovoculi</i> | Present  | Ocular         |
| 57912   | Nebraska     | <i>M. bovoculi</i>  | <i>M. bovoculi</i> | 2.51              | DSM 21142T LGL | <i>M. bovoculi</i> | DSM 21142T LGL | <i>M. bovoculi</i> | Present  | Ocular         |
| 57913   | Nebraska     | <i>M. bovoculi</i>  | <i>M. bovoculi</i> | 2.43              | DSM 21142T LGL | <i>M. bovoculi</i> | DSM 21142T LGL | <i>M. bovoculi</i> | Present  | Ocular         |
| 57914   | Nebraska     | <i>M. bovoculi</i>  | <i>M. bovoculi</i> | 2.46              | DSM 21142T LGL | <i>M. bovoculi</i> | DSM 21142T LGL | <i>M. bovoculi</i> | Present  | Ocular         |
| 57915   | Nebraska     | <i>M. bovoculi</i>  | <i>M. bovoculi</i> | 2.5               | DSM 21142T LGL | <i>M. bovoculi</i> | DSM 21142T LGL | <i>M. bovis</i>    | Present  | Ocular         |
| 57916   | Nebraska     | <i>M. bovoculi</i>  | <i>M. bovoculi</i> | 2.37              | DSM 21142T LGL | <i>M. bovoculi</i> | DSM 21142T LGL | <i>M. bovoculi</i> | Present  | Ocular         |
| 57917   | Nebraska     | <i>M. bovoculi</i>  | <i>M. bovoculi</i> | 2.46              | DSM 21142T LGL | <i>M. bovoculi</i> | DSM 21142T LGL | <i>M. bovis</i>    | Present  | Ocular         |
| 57918   | North Dakota | <i>M. bovoculi</i>  | <i>M. bovoculi</i> | 2.47              | DSM 21142T LGL | <i>M. bovoculi</i> | DSM 21142T LGL | <i>M. bovoculi</i> | Present  | Ocular         |



| Isolate | State      | Sequencing results* | UNLVDC ID          | UNLVDC top score† | UNLVDC match‡  | BDAL MALDI ID      | BDAL match‡    | PCR-RFLP           | Disease§ | Site of origin |
|---------|------------|---------------------|--------------------|-------------------|----------------|--------------------|----------------|--------------------|----------|----------------|
| 22581   | Missouri   | <i>M. bovoculi</i>  | <i>M. bovoculi</i> | 2.6               | 23343          | <i>M. bovoculi</i> | DSM 21142T LGL | <i>M. bovis</i>    | Absent   | Nasopharynx    |
| 23343   | Tennessee  | <i>M. bovoculi</i>  | <i>M. bovoculi</i> | 2.6               | 23343          | <i>M. bovoculi</i> | DSM 21142T LGL | <i>M. bovis</i>    | Absent   | Nasopharynx    |
| 28389   | Kentucky   | <i>M. bovoculi</i>  | <i>M. bovoculi</i> | 2.55              | 23343          | <i>M. bovoculi</i> | DSM 21142T LGL | <i>M. bovis</i>    | Absent   | Nasopharynx    |
| 33362   | Kansas     | <i>M. bovoculi</i>  | <i>M. bovoculi</i> | 2.58              | 23343          | <i>M. bovoculi</i> | DSM 21142T LGL | <i>M. bovis</i>    | Absent   | Nasopharynx    |
| 57850   | Nebraska   | <i>M. bovoculi</i>  | <i>M. bovoculi</i> | 2.52              | DSM 21142T LGL | <i>M. bovoculi</i> | DSM 21142T LGL | <i>M. bovoculi</i> | Present  | Ocular         |
| 57851   | Montana    | <i>M. bovoculi</i>  | <i>M. bovoculi</i> | 2.42              | DSM 21142T LGL | <i>M. bovoculi</i> | DSM 21142T LGL | <i>M. bovoculi</i> | Present  | Ocular         |
| 57852   | Nebraska   | <i>M. bovoculi</i>  | <i>M. bovoculi</i> | 2.47              | DSM 21142T LGL | <i>M. bovoculi</i> | DSM 21142T LGL | <i>M. bovoculi</i> | Present  | Swab           |
| 57853   | Nebraska   | <i>M. bovoculi</i>  | <i>M. bovoculi</i> | 2.36              | DSM 21142T LGL | <i>M. bovoculi</i> | DSM 21142T LGL | <i>M. bovoculi</i> | Present  | Ocular         |
| 57854   | Nebraska   | <i>M. bovoculi</i>  | <i>M. bovoculi</i> | 2.31              | DSM 21142T LGL | <i>M. bovoculi</i> | DSM 21142T LGL | <i>M. bovoculi</i> | Present  | Ocular         |
| 57855   | Ohio       | <i>M. bovoculi</i>  | <i>M. bovoculi</i> | 2.36              | DSM 21142T LGL | <i>M. bovoculi</i> | DSM 21142T LGL | <i>M. bovoculi</i> | Present  | Ocular         |
| 57857   | Texas      | <i>M. bovoculi</i>  | <i>M. bovoculi</i> | 2.41              | DSM 21142T LGL | <i>M. bovoculi</i> | DSM 21142T LGL | <i>M. bovoculi</i> | Present  | Ocular         |
| 57919   | Washington | <i>M. bovoculi</i>  | <i>M. bovoculi</i> | 2.36              | DSM 21142T LGL | <i>M. bovoculi</i> | DSM 21142T LGL | <i>M. bovoculi</i> | Present  | Ocular         |
| 57920   | Wyoming    | <i>M. bovoculi</i>  | <i>M. bovoculi</i> | 2.49              | DSM 21142T LGL | <i>M. bovoculi</i> | DSM 21142T LGL | <i>M. bovoculi</i> | Present  | Ocular         |
| 57921   | Nebraska   | <i>M. bovoculi</i>  | <i>M. bovoculi</i> | 2.43              | DSM 21142T LGL | <i>M. bovoculi</i> | DSM 21142T LGL | <i>M. bovis</i>    | Present  | Ocular         |
| 57922   | Kansas     | <i>M. bovoculi</i>  | <i>M. bovoculi</i> | 2.42              | DSM 21142T LGL | <i>M. bovoculi</i> | DSM 21142T LGL | <i>M. bovoculi</i> | Present  | Ocular         |
| 57923   | Minnesota  | <i>M. bovoculi</i>  | <i>M. bovoculi</i> | 2.48              | DSM 21142T LGL | <i>M. bovoculi</i> | DSM 21142T LGL | <i>M. bovoculi</i> | Present  | Ocular         |
| 57924   | Nebraska   | <i>M. bovoculi</i>  | <i>M. bovoculi</i> | 2.46              | DSM 21142T LGL | <i>M. bovoculi</i> | DSM 21142T LGL | <i>M. bovoculi</i> | Present  | Ocular         |
| 57925   | Nebraska   | <i>M. bovoculi</i>  | <i>M. bovoculi</i> | 2.53              | DSM 21142T LGL | <i>M. bovoculi</i> | DSM 21142T LGL | <i>M. bovoculi</i> | Present  | Ocular         |
| 57967   | Nebraska   | <i>M. bovoculi</i>  | <i>M. bovoculi</i> | 2.48              | DSM 21142T LGL | <i>M. bovoculi</i> | DSM 21142T LGL | <i>M. bovoculi</i> | Present  | Ocular         |

| Isolate | State     | Sequencing results* | UNLVDC ID          | UNLVDC top score† | UNLVDC match‡  | BDAL MALDI ID      | BDAL match‡    | PCR-RFLP           | Disease§ | Site of origin |
|---------|-----------|---------------------|--------------------|-------------------|----------------|--------------------|----------------|--------------------|----------|----------------|
| 22581   | Missouri  | <i>M. bovoculi</i>  | <i>M. bovoculi</i> | 2.6               | 23343          | <i>M. bovoculi</i> | DSM 21142T LGL | <i>M. bovis</i>    | Absent   | Nasopharynx    |
| 23343   | Tennessee | <i>M. bovoculi</i>  | <i>M. bovoculi</i> | 2.6               | 23343          | <i>M. bovoculi</i> | DSM 21142T LGL | <i>M. bovis</i>    | Absent   | Nasopharynx    |
| 28389   | Kentucky  | <i>M. bovoculi</i>  | <i>M. bovoculi</i> | 2.55              | 23343          | <i>M. bovoculi</i> | DSM 21142T LGL | <i>M. bovis</i>    | Absent   | Nasopharynx    |
| 33362   | Kansas    | <i>M. bovoculi</i>  | <i>M. bovoculi</i> | 2.58              | 23343          | <i>M. bovoculi</i> | DSM 21142T LGL | <i>M. bovis</i>    | Absent   | Nasopharynx    |
| 57850   | Nebraska  | <i>M. bovoculi</i>  | <i>M. bovoculi</i> | 2.52              | DSM 21142T LGL | <i>M. bovoculi</i> | DSM 21142T LGL | <i>M. bovoculi</i> | Present  | Ocular         |
| 57851   | Montana   | <i>M. bovoculi</i>  | <i>M. bovoculi</i> | 2.42              | DSM 21142T LGL | <i>M. bovoculi</i> | DSM 21142T LGL | <i>M. bovoculi</i> | Present  | Ocular         |
| 57852   | Nebraska  | <i>M. bovoculi</i>  | <i>M. bovoculi</i> | 2.47              | DSM 21142T LGL | <i>M. bovoculi</i> | DSM 21142T LGL | <i>M. bovoculi</i> | Present  | Swab           |
| 57853   | Nebraska  | <i>M. bovoculi</i>  | <i>M. bovoculi</i> | 2.36              | DSM 21142T LGL | <i>M. bovoculi</i> | DSM 21142T LGL | <i>M. bovoculi</i> | Present  | Ocular         |
| 57854   | Nebraska  | <i>M. bovoculi</i>  | <i>M. bovoculi</i> | 2.31              | DSM 21142T LGL | <i>M. bovoculi</i> | DSM 21142T LGL | <i>M. bovoculi</i> | Present  | Ocular         |
| 57855   | Ohio      | <i>M. bovoculi</i>  | <i>M. bovoculi</i> | 2.36              | DSM 21142T LGL | <i>M. bovoculi</i> | DSM 21142T LGL | <i>M. bovoculi</i> | Present  | Ocular         |
| 57857   | Texas     | <i>M. bovoculi</i>  | <i>M. bovoculi</i> | 2.41              | DSM 21142T LGL | <i>M. bovoculi</i> | DSM 21142T LGL | <i>M. bovoculi</i> | Present  | Ocular         |
| 57992   | Texas     | <i>M. bovoculi</i>  | <i>M. bovoculi</i> | 2.41              | DSM 21142T LGL | <i>M. bovoculi</i> | DSM 21142T LGL | <i>M. bovis</i>    | Present  | Ocular         |
| 57993   | Nebraska  | <i>M. bovoculi</i>  | <i>M. bovoculi</i> | 2.31              | DSM 21142T LGL | <i>M. bovoculi</i> | DSM 21142T LGL | <i>M. bovis</i>    | Present  | Ocular         |
| 57999   | Nebraska  | <i>M. bovoculi</i>  | <i>M. bovoculi</i> | 2.46              | DSM 21142T LGL | <i>M. bovoculi</i> | DSM 21142T LGL | <i>M. species</i>  | Present  | Ocular         |
| 58000   | Montana   | <i>M. bovoculi</i>  | <i>M. bovoculi</i> | 2.2               | DSM 21142T LGL | <i>M. bovoculi</i> | DSM 21142T LGL | <i>M. bovoculi</i> | Present  | Ocular         |
| 58001   | Montana   | <i>M. bovoculi</i>  | <i>M. bovoculi</i> | 2.42              | DSM 21142T LGL | <i>M. bovoculi</i> | DSM 21142T LGL | <i>M. bovoculi</i> | Present  | Ocular         |
| 58002   | Nebraska  | <i>M. bovoculi</i>  | <i>M. bovoculi</i> | 2.34              | DSM 21142T LGL | <i>M. bovoculi</i> | DSM 21142T LGL | <i>M. bovoculi</i> | Present  | Ocular         |
| 58003   | Nebraska  | <i>M. bovoculi</i>  | <i>M. bovoculi</i> | 2.47              | DSM 21142T LGL | <i>M. bovoculi</i> | DSM 21142T LGL | <i>M. bovoculi</i> | Present  | Ocular         |
| 58004   | Nebraska  | <i>M. bovoculi</i>  | <i>M. bovoculi</i> | 2.43              | DSM 21142T LGL | <i>M. bovoculi</i> | DSM 21142T LGL | <i>M. bovoculi</i> | Present  | Ocular         |

| Isolate | State     | Sequencing results* | UNLVDC ID          | UNLVDC top score† | UNLVDC match‡  | BDAL MALDI ID      | BDAL match‡    | PCR-RFLP           | Disease§ | Site of origin |
|---------|-----------|---------------------|--------------------|-------------------|----------------|--------------------|----------------|--------------------|----------|----------------|
| 22581   | Missouri  | <i>M. bovoculi</i>  | <i>M. bovoculi</i> | 2.6               | 23343          | <i>M. bovoculi</i> | DSM 21142T LGL | <i>M. bovis</i>    | Absent   | Nasopharynx    |
| 23343   | Tennessee | <i>M. bovoculi</i>  | <i>M. bovoculi</i> | 2.6               | 23343          | <i>M. bovoculi</i> | DSM 21142T LGL | <i>M. bovis</i>    | Absent   | Nasopharynx    |
| 28389   | Kentucky  | <i>M. bovoculi</i>  | <i>M. bovoculi</i> | 2.55              | 23343          | <i>M. bovoculi</i> | DSM 21142T LGL | <i>M. bovis</i>    | Absent   | Nasopharynx    |
| 33362   | Kansas    | <i>M. bovoculi</i>  | <i>M. bovoculi</i> | 2.58              | 23343          | <i>M. bovoculi</i> | DSM 21142T LGL | <i>M. bovis</i>    | Absent   | Nasopharynx    |
| 57850   | Nebraska  | <i>M. bovoculi</i>  | <i>M. bovoculi</i> | 2.52              | DSM 21142T LGL | <i>M. bovoculi</i> | DSM 21142T LGL | <i>M. bovoculi</i> | Present  | Ocular         |
| 57851   | Montana   | <i>M. bovoculi</i>  | <i>M. bovoculi</i> | 2.42              | DSM 21142T LGL | <i>M. bovoculi</i> | DSM 21142T LGL | <i>M. bovoculi</i> | Present  | Ocular         |
| 57852   | Nebraska  | <i>M. bovoculi</i>  | <i>M. bovoculi</i> | 2.47              | DSM 21142T LGL | <i>M. bovoculi</i> | DSM 21142T LGL | <i>M. bovoculi</i> | Present  | Swab           |
| 57853   | Nebraska  | <i>M. bovoculi</i>  | <i>M. bovoculi</i> | 2.36              | DSM 21142T LGL | <i>M. bovoculi</i> | DSM 21142T LGL | <i>M. bovoculi</i> | Present  | Ocular         |
| 57854   | Nebraska  | <i>M. bovoculi</i>  | <i>M. bovoculi</i> | 2.31              | DSM 21142T LGL | <i>M. bovoculi</i> | DSM 21142T LGL | <i>M. bovoculi</i> | Present  | Ocular         |
| 57855   | Ohio      | <i>M. bovoculi</i>  | <i>M. bovoculi</i> | 2.36              | DSM 21142T LGL | <i>M. bovoculi</i> | DSM 21142T LGL | <i>M. bovoculi</i> | Present  | Ocular         |
| 57857   | Texas     | <i>M. bovoculi</i>  | <i>M. bovoculi</i> | 2.41              | DSM 21142T LGL | <i>M. bovoculi</i> | DSM 21142T LGL | <i>M. bovoculi</i> | Present  | Ocular         |
| 58005   | Nebraska  | <i>M. bovoculi</i>  | <i>M. bovoculi</i> | 2.48              | DSM 21142T LGL | <i>M. bovoculi</i> | DSM 21142T LGL | <i>M. bovoculi</i> | Present  | Ocular         |
| 58006   | Nebraska  | <i>M. bovoculi</i>  | <i>M. bovoculi</i> | 2.34              | DSM 21142T LGL | <i>M. bovoculi</i> | DSM 21142T LGL | <i>M. bovoculi</i> | Present  | Ocular         |
| 58007   | Nebraska  | <i>M. bovoculi</i>  | <i>M. bovoculi</i> | 2.43              | DSM 21142T LGL | <i>M. bovoculi</i> | DSM 21142T LGL | <i>M. bovoculi</i> | Present  | Ocular         |
| 58008   | Nebraska  | <i>M. bovoculi</i>  | <i>M. bovoculi</i> | 2.25              | ATCC 19575 New | <i>M. bovoculi</i> | DSM 21142T LGL | <i>M. bovoculi</i> | Present  | Ocular         |
| 58009   | Montana   | <i>M. bovoculi</i>  | <i>M. bovoculi</i> | 2.48              | DSM 21142T LGL | <i>M. bovoculi</i> | DSM 21142T LGL | <i>M. bovoculi</i> | Present  | Ocular         |
| 58010   | Tennessee | <i>M. bovoculi</i>  | <i>M. bovoculi</i> | 2.38              | DSM 21142T LGL | <i>M. bovoculi</i> | DSM 21142T LGL | <i>M. bovis</i>    | Present  | Ocular         |
| 58011   | Illinois  | <i>M. bovoculi</i>  | <i>M. bovoculi</i> | 2.38              | DSM 21142T LGL | <i>M. bovoculi</i> | DSM 21142T LGL | <i>M. bovoculi</i> | Present  | Ocular         |
| 58012   | Nebraska  | <i>M. bovoculi</i>  | <i>M. bovoculi</i> | 2.42              | DSM 21142T LGL | <i>M. bovoculi</i> | DSM 21142T LGL | <i>M. bovoculi</i> | Present  | Ocular         |

| Isolate | State     | Sequencing results* | UNLVDC ID          | UNLVDC top score† | UNLVDC match‡  | BDAL MALDI ID      | BDAL match‡    | PCR-RFLP           | Disease§ | Site of origin |
|---------|-----------|---------------------|--------------------|-------------------|----------------|--------------------|----------------|--------------------|----------|----------------|
| 22581   | Missouri  | <i>M. bovoculi</i>  | <i>M. bovoculi</i> | 2.6               | 23343          | <i>M. bovoculi</i> | DSM 21142T LGL | <i>M. bovis</i>    | Absent   | Nasopharynx    |
| 23343   | Tennessee | <i>M. bovoculi</i>  | <i>M. bovoculi</i> | 2.6               | 23343          | <i>M. bovoculi</i> | DSM 21142T LGL | <i>M. bovis</i>    | Absent   | Nasopharynx    |
| 28389   | Kentucky  | <i>M. bovoculi</i>  | <i>M. bovoculi</i> | 2.55              | 23343          | <i>M. bovoculi</i> | DSM 21142T LGL | <i>M. bovis</i>    | Absent   | Nasopharynx    |
| 33362   | Kansas    | <i>M. bovoculi</i>  | <i>M. bovoculi</i> | 2.58              | 23343          | <i>M. bovoculi</i> | DSM 21142T LGL | <i>M. bovis</i>    | Absent   | Nasopharynx    |
| 57850   | Nebraska  | <i>M. bovoculi</i>  | <i>M. bovoculi</i> | 2.52              | DSM 21142T LGL | <i>M. bovoculi</i> | DSM 21142T LGL | <i>M. bovoculi</i> | Present  | Ocular         |
| 57851   | Montana   | <i>M. bovoculi</i>  | <i>M. bovoculi</i> | 2.42              | DSM 21142T LGL | <i>M. bovoculi</i> | DSM 21142T LGL | <i>M. bovoculi</i> | Present  | Ocular         |
| 57852   | Nebraska  | <i>M. bovoculi</i>  | <i>M. bovoculi</i> | 2.47              | DSM 21142T LGL | <i>M. bovoculi</i> | DSM 21142T LGL | <i>M. bovoculi</i> | Present  | Swab           |
| 57853   | Nebraska  | <i>M. bovoculi</i>  | <i>M. bovoculi</i> | 2.36              | DSM 21142T LGL | <i>M. bovoculi</i> | DSM 21142T LGL | <i>M. bovoculi</i> | Present  | Ocular         |
| 57854   | Nebraska  | <i>M. bovoculi</i>  | <i>M. bovoculi</i> | 2.31              | DSM 21142T LGL | <i>M. bovoculi</i> | DSM 21142T LGL | <i>M. bovoculi</i> | Present  | Ocular         |
| 57855   | Ohio      | <i>M. bovoculi</i>  | <i>M. bovoculi</i> | 2.36              | DSM 21142T LGL | <i>M. bovoculi</i> | DSM 21142T LGL | <i>M. bovoculi</i> | Present  | Ocular         |
| 57857   | Texas     | <i>M. bovoculi</i>  | <i>M. bovoculi</i> | 2.41              | DSM 21142T LGL | <i>M. bovoculi</i> | DSM 21142T LGL | <i>M. bovoculi</i> | Present  | Ocular         |
| 58013   | Nebraska  | <i>M. bovoculi</i>  | <i>M. bovoculi</i> | 2.39              | DSM 21142T LGL | <i>M. bovoculi</i> | DSM 21142T LGL | <i>M. bovoculi</i> | Present  | Ocular         |
| 58014   | Nebraska  | <i>M. bovoculi</i>  | <i>M. bovoculi</i> | 2.55              | DSM 21142T LGL | <i>M. bovoculi</i> | DSM 21142T LGL | <i>M. bovoculi</i> | Present  | Ocular         |
| 58015   | Illinois  | <i>M. bovoculi</i>  | <i>M. bovoculi</i> | 2.44              | DSM 21142T LGL | <i>M. bovoculi</i> | DSM 21142T LGL | <i>M. bovis</i>    | Present  | Ocular         |
| 58016   | Illinois  | <i>M. bovoculi</i>  | <i>M. bovoculi</i> | 2.55              | DSM 21142T LGL | <i>M. bovoculi</i> | DSM 21142T LGL | <i>M. bovoculi</i> | Present  | Ocular         |
| 58017   | Kansas    | <i>M. bovoculi</i>  | <i>M. bovoculi</i> | 2.46              | DSM 21142T LGL | <i>M. bovoculi</i> | DSM 21142T LGL | <i>M. bovoculi</i> | Present  | Ocular         |
| 58018   | Nebraska  | <i>M. bovoculi</i>  | <i>M. bovoculi</i> | 2.43              | DSM 21142T LGL | <i>M. bovoculi</i> | DSM 21142T LGL | <i>M. bovoculi</i> | Present  | Ocular         |
| 58019   | Nebraska  | <i>M. bovoculi</i>  | <i>M. bovoculi</i> | 2.28              | ATCC 19575 New | <i>M. bovoculi</i> | DSM 21142T LGL | <i>M. bovoculi</i> | Present  | Ocular         |
| 58020   | Nebraska  | <i>M. bovoculi</i>  | <i>M. bovoculi</i> | 2.42              | ATCC 19575 New | <i>M. bovoculi</i> | DSM 21142T LGL | <i>M. bovoculi</i> | Present  | Ocular         |

| Isolate | State        | Sequencing results* | UNLVDC ID          | UNLVDC top score† | UNLVDC match‡  | BDAL MALDI ID      | BDAL match‡    | PCR-RFLP           | Disease§ | Site of origin |
|---------|--------------|---------------------|--------------------|-------------------|----------------|--------------------|----------------|--------------------|----------|----------------|
| 22581   | Missouri     | <i>M. bovoculi</i>  | <i>M. bovoculi</i> | 2.6               | 23343          | <i>M. bovoculi</i> | DSM 21142T LGL | <i>M. bovis</i>    | Absent   | Nasopharynx    |
| 23343   | Tennessee    | <i>M. bovoculi</i>  | <i>M. bovoculi</i> | 2.6               | 23343          | <i>M. bovoculi</i> | DSM 21142T LGL | <i>M. bovis</i>    | Absent   | Nasopharynx    |
| 28389   | Kentucky     | <i>M. bovoculi</i>  | <i>M. bovoculi</i> | 2.55              | 23343          | <i>M. bovoculi</i> | DSM 21142T LGL | <i>M. bovis</i>    | Absent   | Nasopharynx    |
| 33362   | Kansas       | <i>M. bovoculi</i>  | <i>M. bovoculi</i> | 2.58              | 23343          | <i>M. bovoculi</i> | DSM 21142T LGL | <i>M. bovis</i>    | Absent   | Nasopharynx    |
| 57850   | Nebraska     | <i>M. bovoculi</i>  | <i>M. bovoculi</i> | 2.52              | DSM 21142T LGL | <i>M. bovoculi</i> | DSM 21142T LGL | <i>M. bovoculi</i> | Present  | Ocular         |
| 57851   | Montana      | <i>M. bovoculi</i>  | <i>M. bovoculi</i> | 2.42              | DSM 21142T LGL | <i>M. bovoculi</i> | DSM 21142T LGL | <i>M. bovoculi</i> | Present  | Ocular         |
| 57852   | Nebraska     | <i>M. bovoculi</i>  | <i>M. bovoculi</i> | 2.47              | DSM 21142T LGL | <i>M. bovoculi</i> | DSM 21142T LGL | <i>M. bovoculi</i> | Present  | Swab           |
| 57853   | Nebraska     | <i>M. bovoculi</i>  | <i>M. bovoculi</i> | 2.36              | DSM 21142T LGL | <i>M. bovoculi</i> | DSM 21142T LGL | <i>M. bovoculi</i> | Present  | Ocular         |
| 57854   | Nebraska     | <i>M. bovoculi</i>  | <i>M. bovoculi</i> | 2.31              | DSM 21142T LGL | <i>M. bovoculi</i> | DSM 21142T LGL | <i>M. bovoculi</i> | Present  | Ocular         |
| 57855   | Ohio         | <i>M. bovoculi</i>  | <i>M. bovoculi</i> | 2.36              | DSM 21142T LGL | <i>M. bovoculi</i> | DSM 21142T LGL | <i>M. bovoculi</i> | Present  | Ocular         |
| 57857   | Texas        | <i>M. bovoculi</i>  | <i>M. bovoculi</i> | 2.41              | DSM 21142T LGL | <i>M. bovoculi</i> | DSM 21142T LGL | <i>M. bovoculi</i> | Present  | Ocular         |
| 58022   | Nebraska     | <i>M. bovoculi</i>  | <i>M. bovoculi</i> | 2.48              | DSM 21142T LGL | <i>M. bovoculi</i> | DSM 21142T LGL | <i>M. bovoculi</i> | Present  | Ocular         |
| 58023   | Nebraska     | <i>M. bovoculi</i>  | <i>M. bovoculi</i> | 2.49              | DSM 21142T LGL | <i>M. bovoculi</i> | DSM 21142T LGL | <i>M. bovoculi</i> | Present  | Ocular         |
| 58024   | Nebraska     | <i>M. bovoculi</i>  | <i>M. bovoculi</i> | 2.34              | DSM 21142T LGL | <i>M. bovoculi</i> | DSM 21142T LGL | <i>M. bovoculi</i> | Present  | Ocular         |
| 58025   | Nebraska     | <i>M. bovoculi</i>  | <i>M. bovoculi</i> | 2.33              | DSM 21142T LGL | <i>M. bovoculi</i> | DSM 21142T LGL | <i>M. bovoculi</i> | Present  | Ocular         |
| 58026   | Oklahoma     | <i>M. bovoculi</i>  | <i>M. bovoculi</i> | 2.37              | DSM 21142T LGL | <i>M. bovoculi</i> | DSM 21142T LGL | <i>M. bovoculi</i> | Present  | Ocular         |
| 58027   | Virginia     | <i>M. bovoculi</i>  | <i>M. bovoculi</i> | 2.55              | DSM 21142T LGL | <i>M. bovoculi</i> | DSM 21142T LGL | <i>M. bovoculi</i> | Present  | Ocular         |
| 58028   | South Dakota | <i>M. bovoculi</i>  | <i>M. bovoculi</i> | 2.46              | DSM 21142T LGL | <i>M. bovoculi</i> | DSM 21142T LGL | <i>M. bovoculi</i> | Present  | Ocular         |
| 58029   | Wisconsin    | <i>M. bovoculi</i>  | <i>M. bovoculi</i> | 2.49              | DSM 21142T LGL | <i>M. bovoculi</i> | DSM 21142T LGL | <i>M. bovoculi</i> | Present  | Ocular         |

| Isolate | State     | Sequencing results* | UNLVDC ID          | UNLVDC top score† | UNLVDC match‡  | BDAL MALDI ID      | BDAL match‡    | PCR-RFLP           | Disease§ | Site of origin |
|---------|-----------|---------------------|--------------------|-------------------|----------------|--------------------|----------------|--------------------|----------|----------------|
| 22581   | Missouri  | <i>M. bovoculi</i>  | <i>M. bovoculi</i> | 2.6               | 23343          | <i>M. bovoculi</i> | DSM 21142T LGL | <i>M. bovis</i>    | Absent   | Nasopharynx    |
| 23343   | Tennessee | <i>M. bovoculi</i>  | <i>M. bovoculi</i> | 2.6               | 23343          | <i>M. bovoculi</i> | DSM 21142T LGL | <i>M. bovis</i>    | Absent   | Nasopharynx    |
| 28389   | Kentucky  | <i>M. bovoculi</i>  | <i>M. bovoculi</i> | 2.55              | 23343          | <i>M. bovoculi</i> | DSM 21142T LGL | <i>M. bovis</i>    | Absent   | Nasopharynx    |
| 33362   | Kansas    | <i>M. bovoculi</i>  | <i>M. bovoculi</i> | 2.58              | 23343          | <i>M. bovoculi</i> | DSM 21142T LGL | <i>M. bovis</i>    | Absent   | Nasopharynx    |
| 57850   | Nebraska  | <i>M. bovoculi</i>  | <i>M. bovoculi</i> | 2.52              | DSM 21142T LGL | <i>M. bovoculi</i> | DSM 21142T LGL | <i>M. bovoculi</i> | Present  | Ocular         |
| 57851   | Montana   | <i>M. bovoculi</i>  | <i>M. bovoculi</i> | 2.42              | DSM 21142T LGL | <i>M. bovoculi</i> | DSM 21142T LGL | <i>M. bovoculi</i> | Present  | Ocular         |
| 57852   | Nebraska  | <i>M. bovoculi</i>  | <i>M. bovoculi</i> | 2.47              | DSM 21142T LGL | <i>M. bovoculi</i> | DSM 21142T LGL | <i>M. bovoculi</i> | Present  | Swab           |
| 57853   | Nebraska  | <i>M. bovoculi</i>  | <i>M. bovoculi</i> | 2.36              | DSM 21142T LGL | <i>M. bovoculi</i> | DSM 21142T LGL | <i>M. bovoculi</i> | Present  | Ocular         |
| 57854   | Nebraska  | <i>M. bovoculi</i>  | <i>M. bovoculi</i> | 2.31              | DSM 21142T LGL | <i>M. bovoculi</i> | DSM 21142T LGL | <i>M. bovoculi</i> | Present  | Ocular         |
| 57855   | Ohio      | <i>M. bovoculi</i>  | <i>M. bovoculi</i> | 2.36              | DSM 21142T LGL | <i>M. bovoculi</i> | DSM 21142T LGL | <i>M. bovoculi</i> | Present  | Ocular         |
| 57857   | Texas     | <i>M. bovoculi</i>  | <i>M. bovoculi</i> | 2.41              | DSM 21142T LGL | <i>M. bovoculi</i> | DSM 21142T LGL | <i>M. bovoculi</i> | Present  | Ocular         |
| 58030   | Kansas    | <i>M. bovoculi</i>  | <i>M. bovoculi</i> | 2.49              | DSM 21142T LGL | <i>M. bovoculi</i> | DSM 21142T LGL | <i>M. bovoculi</i> | Present  | Ocular         |
| 58031   | Nebraska  | <i>M. bovoculi</i>  | <i>M. bovoculi</i> | 2.54              | DSM 21142T LGL | <i>M. bovoculi</i> | DSM 21142T LGL | <i>M. bovoculi</i> | Present  | Ocular         |
| 58032   | Nebraska  | <i>M. bovoculi</i>  | <i>M. bovoculi</i> | 2.51              | DSM 21142T LGL | <i>M. bovoculi</i> | DSM 21142T LGL | <i>M. bovoculi</i> | Present  | Ocular         |
| 58033   | Nebraska  | <i>M. bovoculi</i>  | <i>M. bovoculi</i> | 2.43              | DSM 21142T LGL | <i>M. bovoculi</i> | DSM 21142T LGL | <i>M. bovoculi</i> | Present  | Ocular         |
| 58035   | Illinois  | <i>M. bovoculi</i>  | <i>M. bovoculi</i> | 2.55              | DSM 21142T LGL | <i>M. bovoculi</i> | DSM 21142T LGL | <i>M. bovoculi</i> | Present  | Ocular         |
| 58036   | Iowa      | <i>M. bovoculi</i>  | <i>M. bovoculi</i> | 2.47              | DSM 21142T LGL | <i>M. bovoculi</i> | DSM 21142T LGL | <i>M. bovoculi</i> | Present  | Ocular         |
| 58037   | Nebraska  | <i>M. bovoculi</i>  | <i>M. bovoculi</i> | 2.45              | DSM 21142T LGL | <i>M. bovoculi</i> | DSM 21142T LGL | <i>M. bovoculi</i> | Present  | Ocular         |
| 58038   | Nebraska  | <i>M. bovoculi</i>  | <i>M. bovoculi</i> | 2.49              | DSM 21142T LGL | <i>M. bovoculi</i> | DSM 21142T LGL | <i>M. bovoculi</i> | Present  | Ocular         |

| Isolate | State     | Sequencing results* | UNLVDC ID          | UNLVDC top score† | UNLVDC match‡  | BDAL MALDI ID      | BDAL match‡    | PCR-RFLP           | Disease§ | Site of origin |
|---------|-----------|---------------------|--------------------|-------------------|----------------|--------------------|----------------|--------------------|----------|----------------|
| 22581   | Missouri  | <i>M. bovoculi</i>  | <i>M. bovoculi</i> | 2.6               | 23343          | <i>M. bovoculi</i> | DSM 21142T LGL | <i>M. bovis</i>    | Absent   | Nasopharynx    |
| 23343   | Tennessee | <i>M. bovoculi</i>  | <i>M. bovoculi</i> | 2.6               | 23343          | <i>M. bovoculi</i> | DSM 21142T LGL | <i>M. bovis</i>    | Absent   | Nasopharynx    |
| 28389   | Kentucky  | <i>M. bovoculi</i>  | <i>M. bovoculi</i> | 2.55              | 23343          | <i>M. bovoculi</i> | DSM 21142T LGL | <i>M. bovis</i>    | Absent   | Nasopharynx    |
| 33362   | Kansas    | <i>M. bovoculi</i>  | <i>M. bovoculi</i> | 2.58              | 23343          | <i>M. bovoculi</i> | DSM 21142T LGL | <i>M. bovis</i>    | Absent   | Nasopharynx    |
| 57850   | Nebraska  | <i>M. bovoculi</i>  | <i>M. bovoculi</i> | 2.52              | DSM 21142T LGL | <i>M. bovoculi</i> | DSM 21142T LGL | <i>M. bovoculi</i> | Present  | Ocular         |
| 57851   | Montana   | <i>M. bovoculi</i>  | <i>M. bovoculi</i> | 2.42              | DSM 21142T LGL | <i>M. bovoculi</i> | DSM 21142T LGL | <i>M. bovoculi</i> | Present  | Ocular         |
| 57852   | Nebraska  | <i>M. bovoculi</i>  | <i>M. bovoculi</i> | 2.47              | DSM 21142T LGL | <i>M. bovoculi</i> | DSM 21142T LGL | <i>M. bovoculi</i> | Present  | Swab           |
| 57853   | Nebraska  | <i>M. bovoculi</i>  | <i>M. bovoculi</i> | 2.36              | DSM 21142T LGL | <i>M. bovoculi</i> | DSM 21142T LGL | <i>M. bovoculi</i> | Present  | Ocular         |
| 57854   | Nebraska  | <i>M. bovoculi</i>  | <i>M. bovoculi</i> | 2.31              | DSM 21142T LGL | <i>M. bovoculi</i> | DSM 21142T LGL | <i>M. bovoculi</i> | Present  | Ocular         |
| 57855   | Ohio      | <i>M. bovoculi</i>  | <i>M. bovoculi</i> | 2.36              | DSM 21142T LGL | <i>M. bovoculi</i> | DSM 21142T LGL | <i>M. bovoculi</i> | Present  | Ocular         |
| 57857   | Texas     | <i>M. bovoculi</i>  | <i>M. bovoculi</i> | 2.41              | DSM 21142T LGL | <i>M. bovoculi</i> | DSM 21142T LGL | <i>M. bovoculi</i> | Present  | Ocular         |
| 58039   | Kansas    | <i>M. bovoculi</i>  | <i>M. bovoculi</i> | 2.44              | DSM 21142T LGL | <i>M. bovoculi</i> | DSM 21142T LGL | <i>M. bovoculi</i> | Present  | Ocular         |
| 58040   | Montana   | <i>M. bovoculi</i>  | <i>M. bovoculi</i> | 2.46              | DSM 21142T LGL | <i>M. bovoculi</i> | DSM 21142T LGL | <i>M. bovoculi</i> | Present  | Ocular         |
| 58041   | Nebraska  | <i>M. bovoculi</i>  | <i>M. bovoculi</i> | 2.45              | DSM 21142T LGL | <i>M. bovoculi</i> | DSM 21142T LGL | <i>M. bovoculi</i> | Present  | Ocular         |
| 58042   | New York  | <i>M. bovoculi</i>  | <i>M. bovoculi</i> | 2.45              | DSM 21142T LGL | <i>M. bovoculi</i> | DSM 21142T LGL | <i>M. bovoculi</i> | Present  | Ocular         |
| 58043   | Oklahoma  | <i>M. bovoculi</i>  | <i>M. bovoculi</i> | 2.41              | DSM 21142T LGL | <i>M. bovoculi</i> | DSM 21142T LGL | <i>M. bovoculi</i> | Present  | Ocular         |
| 58044   | Oklahoma  | <i>M. bovoculi</i>  | <i>M. bovoculi</i> | 2.37              | DSM 21142T LGL | <i>M. bovoculi</i> | DSM 21142T LGL | <i>M. bovoculi</i> | Present  | Ocular         |
| 58046   | Texas     | <i>M. bovoculi</i>  | <i>M. bovoculi</i> | 2.41              | DSM 21142T LGL | <i>M. bovoculi</i> | DSM 21142T LGL | <i>M. bovoculi</i> | Present  | Ocular         |
| 58047   | Virginia  | <i>M. bovoculi</i>  | <i>M. bovoculi</i> | 2.35              | DSM 21142T LGL | <i>M. bovoculi</i> | DSM 21142T LGL | <i>M. bovoculi</i> | Present  | Ocular         |

| Isolate | State     | Sequencing results* | UNLVDC ID          | UNLVDC top score† | UNLVDC match‡  | BDAL MALDI ID      | BDAL match‡    | PCR-RFLP           | Disease§ | Site of origin |
|---------|-----------|---------------------|--------------------|-------------------|----------------|--------------------|----------------|--------------------|----------|----------------|
| 22581   | Missouri  | <i>M. bovoculi</i>  | <i>M. bovoculi</i> | 2.6               | 23343          | <i>M. bovoculi</i> | DSM 21142T LGL | <i>M. bovis</i>    | Absent   | Nasopharynx    |
| 23343   | Tennessee | <i>M. bovoculi</i>  | <i>M. bovoculi</i> | 2.6               | 23343          | <i>M. bovoculi</i> | DSM 21142T LGL | <i>M. bovis</i>    | Absent   | Nasopharynx    |
| 28389   | Kentucky  | <i>M. bovoculi</i>  | <i>M. bovoculi</i> | 2.55              | 23343          | <i>M. bovoculi</i> | DSM 21142T LGL | <i>M. bovis</i>    | Absent   | Nasopharynx    |
| 33362   | Kansas    | <i>M. bovoculi</i>  | <i>M. bovoculi</i> | 2.58              | 23343          | <i>M. bovoculi</i> | DSM 21142T LGL | <i>M. bovis</i>    | Absent   | Nasopharynx    |
| 57850   | Nebraska  | <i>M. bovoculi</i>  | <i>M. bovoculi</i> | 2.52              | DSM 21142T LGL | <i>M. bovoculi</i> | DSM 21142T LGL | <i>M. bovoculi</i> | Present  | Ocular         |
| 57851   | Montana   | <i>M. bovoculi</i>  | <i>M. bovoculi</i> | 2.42              | DSM 21142T LGL | <i>M. bovoculi</i> | DSM 21142T LGL | <i>M. bovoculi</i> | Present  | Ocular         |
| 57852   | Nebraska  | <i>M. bovoculi</i>  | <i>M. bovoculi</i> | 2.47              | DSM 21142T LGL | <i>M. bovoculi</i> | DSM 21142T LGL | <i>M. bovoculi</i> | Present  | Swab           |
| 57853   | Nebraska  | <i>M. bovoculi</i>  | <i>M. bovoculi</i> | 2.36              | DSM 21142T LGL | <i>M. bovoculi</i> | DSM 21142T LGL | <i>M. bovoculi</i> | Present  | Ocular         |
| 57854   | Nebraska  | <i>M. bovoculi</i>  | <i>M. bovoculi</i> | 2.31              | DSM 21142T LGL | <i>M. bovoculi</i> | DSM 21142T LGL | <i>M. bovoculi</i> | Present  | Ocular         |
| 57855   | Ohio      | <i>M. bovoculi</i>  | <i>M. bovoculi</i> | 2.36              | DSM 21142T LGL | <i>M. bovoculi</i> | DSM 21142T LGL | <i>M. bovoculi</i> | Present  | Ocular         |
| 57857   | Texas     | <i>M. bovoculi</i>  | <i>M. bovoculi</i> | 2.41              | DSM 21142T LGL | <i>M. bovoculi</i> | DSM 21142T LGL | <i>M. bovoculi</i> | Present  | Ocular         |
| 58048   | Virginia  | <i>M. bovoculi</i>  | <i>M. bovoculi</i> | 2.3               | DSM 21142T LGL | <i>M. bovoculi</i> | DSM 21142T LGL | <i>M. bovoculi</i> | Present  | Ocular         |
| 58049   | Nebraska  | <i>M. bovoculi</i>  | <i>M. bovoculi</i> | 2.45              | DSM 21142T LGL | <i>M. bovoculi</i> | DSM 21142T LGL | <i>M. bovoculi</i> | Present  | Ocular         |
| 58050   | Illinois  | <i>M. bovoculi</i>  | <i>M. bovoculi</i> | 2.44              | DSM 21142T LGL | <i>M. bovoculi</i> | DSM 21142T LGL | <i>M. bovoculi</i> | Present  | Ocular         |
| 58051   | Nebraska  | <i>M. bovoculi</i>  | <i>M. bovoculi</i> | 2.48              | DSM 21142T LGL | <i>M. bovoculi</i> | DSM 21142T LGL | <i>M. bovoculi</i> | Present  | Ocular         |
| 58052   | Nebraska  | <i>M. bovoculi</i>  | <i>M. bovoculi</i> | 2.39              | DSM 21142T LGL | <i>M. bovoculi</i> | DSM 21142T LGL | <i>M. bovoculi</i> | Present  | Ocular         |
| 58053   | Montana   | <i>M. bovoculi</i>  | <i>M. bovoculi</i> | 2.38              | DSM 21142T LGL | <i>M. bovoculi</i> | DSM 21142T LGL | <i>M. bovoculi</i> | Present  | Ocular         |
| 58054   | Kansas    | <i>M. bovoculi</i>  | <i>M. bovoculi</i> | 2.43              | DSM 21142T LGL | <i>M. bovoculi</i> | DSM 21142T LGL | <i>M. bovoculi</i> | Present  | Ocular         |
| 58055   | Kansas    | <i>M. bovoculi</i>  | <i>M. bovoculi</i> | 2.31              | DSM 21142T LGL | <i>M. bovoculi</i> | DSM 21142T LGL | <i>M. bovoculi</i> | Present  | Ocular         |



| Isolate | State     | Sequencing results* | UNLVDC ID          | UNLVDC top score† | UNLVDC match‡                 | BDAL MALDI ID      | BDAL match‡    | PCR-RFLP           | Disease§ | Site of origin |
|---------|-----------|---------------------|--------------------|-------------------|-------------------------------|--------------------|----------------|--------------------|----------|----------------|
| 22581   | Missouri  | <i>M. bovoculi</i>  | <i>M. bovoculi</i> | 2.6               | 23343                         | <i>M. bovoculi</i> | DSM 21142T LGL | <i>M. bovis</i>    | Absent   | Nasopharynx    |
| 23343   | Tennessee | <i>M. bovoculi</i>  | <i>M. bovoculi</i> | 2.6               | 23343                         | <i>M. bovoculi</i> | DSM 21142T LGL | <i>M. bovis</i>    | Absent   | Nasopharynx    |
| 28389   | Kentucky  | <i>M. bovoculi</i>  | <i>M. bovoculi</i> | 2.55              | 23343                         | <i>M. bovoculi</i> | DSM 21142T LGL | <i>M. bovis</i>    | Absent   | Nasopharynx    |
| 33362   | Kansas    | <i>M. bovoculi</i>  | <i>M. bovoculi</i> | 2.58              | 23343                         | <i>M. bovoculi</i> | DSM 21142T LGL | <i>M. bovis</i>    | Absent   | Nasopharynx    |
| 57850   | Nebraska  | <i>M. bovoculi</i>  | <i>M. bovoculi</i> | 2.52              | DSM 21142T LGL                | <i>M. bovoculi</i> | DSM 21142T LGL | <i>M. bovoculi</i> | Present  | Ocular         |
| 57851   | Montana   | <i>M. bovoculi</i>  | <i>M. bovoculi</i> | 2.42              | DSM 21142T LGL                | <i>M. bovoculi</i> | DSM 21142T LGL | <i>M. bovoculi</i> | Present  | Ocular         |
| 57852   | Nebraska  | <i>M. bovoculi</i>  | <i>M. bovoculi</i> | 2.47              | DSM 21142T LGL                | <i>M. bovoculi</i> | DSM 21142T LGL | <i>M. bovoculi</i> | Present  | Swab           |
| 57853   | Nebraska  | <i>M. bovoculi</i>  | <i>M. bovoculi</i> | 2.36              | DSM 21142T LGL                | <i>M. bovoculi</i> | DSM 21142T LGL | <i>M. bovoculi</i> | Present  | Ocular         |
| 57854   | Nebraska  | <i>M. bovoculi</i>  | <i>M. bovoculi</i> | 2.31              | DSM 21142T LGL                | <i>M. bovoculi</i> | DSM 21142T LGL | <i>M. bovoculi</i> | Present  | Ocular         |
| 57855   | Ohio      | <i>M. bovoculi</i>  | <i>M. bovoculi</i> | 2.36              | DSM 21142T LGL                | <i>M. bovoculi</i> | DSM 21142T LGL | <i>M. bovoculi</i> | Present  | Ocular         |
| 57857   | Texas     | <i>M. bovoculi</i>  | <i>M. bovoculi</i> | 2.41              | DSM 21142T LGL                | <i>M. bovoculi</i> | DSM 21142T LGL | <i>M. bovoculi</i> | Present  | Ocular         |
| 58056   | Nebraska  | <i>M. bovoculi</i>  | <i>M. bovoculi</i> | 2.39              | DSM 21142T LGL                | <i>M. bovoculi</i> | DSM 21142T LGL | <i>M. bovoculi</i> | Present  | Ocular         |
| 58057   | Nebraska  | <i>M. bovoculi</i>  | <i>M. bovoculi</i> | 2.5               | DSM 21142T LGL                | <i>M. bovoculi</i> | DSM 21142T LGL | <i>M. bovoculi</i> | Present  | Ocular         |
| 58058   | Nebraska  | <i>M. bovoculi</i>  | <i>M. bovoculi</i> | 2.29              | DSM 21142T LGL                | <i>M. bovoculi</i> | DSM 21142T LGL | <i>M. bovoculi</i> | Present  | Ocular         |
| 58059   | Virginia  | <i>M. bovoculi</i>  | <i>M. bovoculi</i> | 2.43              | DSM 21142T LGL                | <i>M. bovoculi</i> | DSM 21142T LGL | <i>M. bovoculi</i> | Present  | Ocular         |
| 58060   | Nebraska  | <i>M. bovoculi</i>  | <i>M. bovoculi</i> | 2.47              | DSM 21142T LGL                | <i>M. bovoculi</i> | DSM 21142T LGL | <i>M. bovoculi</i> | Present  | Ocular         |
| 58061   | Nebraska  | <i>M. bovoculi</i>  | <i>M. bovoculi</i> | 2.48              | DSM 21142T LGL                | <i>M. bovoculi</i> | DSM 21142T LGL | <i>M. bovoculi</i> | Present  | Ocular         |
| 58062   | Nebraska  | <i>M. bovoculi</i>  | <i>M. bovoculi</i> | 2.34              | DSM 21142T LGL/ATCC 19575 New | <i>M. bovoculi</i> | DSM 21142T LGL | <i>M. bovoculi</i> | Present  | Ocular         |
| 58063   | Minnesota | <i>M. bovoculi</i>  | <i>M. bovoculi</i> | 2.51              | DSM 21142T LGL                | <i>M. bovoculi</i> | DSM 21142T LGL | <i>M. bovoculi</i> | Present  | Ocular         |

| Isolate | State     | Sequencing results* | UNLVDC ID          | UNLVDC top score† | UNLVDC match‡  | BDAL MALDI ID      | BDAL match‡    | PCR-RFLP           | Disease§ | Site of origin |
|---------|-----------|---------------------|--------------------|-------------------|----------------|--------------------|----------------|--------------------|----------|----------------|
| 22581   | Missouri  | <i>M. bovoculi</i>  | <i>M. bovoculi</i> | 2.6               | 23343          | <i>M. bovoculi</i> | DSM 21142T LGL | <i>M. bovis</i>    | Absent   | Nasopharynx    |
| 23343   | Tennessee | <i>M. bovoculi</i>  | <i>M. bovoculi</i> | 2.6               | 23343          | <i>M. bovoculi</i> | DSM 21142T LGL | <i>M. bovis</i>    | Absent   | Nasopharynx    |
| 28389   | Kentucky  | <i>M. bovoculi</i>  | <i>M. bovoculi</i> | 2.55              | 23343          | <i>M. bovoculi</i> | DSM 21142T LGL | <i>M. bovis</i>    | Absent   | Nasopharynx    |
| 33362   | Kansas    | <i>M. bovoculi</i>  | <i>M. bovoculi</i> | 2.58              | 23343          | <i>M. bovoculi</i> | DSM 21142T LGL | <i>M. bovis</i>    | Absent   | Nasopharynx    |
| 57850   | Nebraska  | <i>M. bovoculi</i>  | <i>M. bovoculi</i> | 2.52              | DSM 21142T LGL | <i>M. bovoculi</i> | DSM 21142T LGL | <i>M. bovoculi</i> | Present  | Ocular         |
| 57851   | Montana   | <i>M. bovoculi</i>  | <i>M. bovoculi</i> | 2.42              | DSM 21142T LGL | <i>M. bovoculi</i> | DSM 21142T LGL | <i>M. bovoculi</i> | Present  | Ocular         |
| 57852   | Nebraska  | <i>M. bovoculi</i>  | <i>M. bovoculi</i> | 2.47              | DSM 21142T LGL | <i>M. bovoculi</i> | DSM 21142T LGL | <i>M. bovoculi</i> | Present  | Swab           |
| 57853   | Nebraska  | <i>M. bovoculi</i>  | <i>M. bovoculi</i> | 2.36              | DSM 21142T LGL | <i>M. bovoculi</i> | DSM 21142T LGL | <i>M. bovoculi</i> | Present  | Ocular         |
| 57854   | Nebraska  | <i>M. bovoculi</i>  | <i>M. bovoculi</i> | 2.31              | DSM 21142T LGL | <i>M. bovoculi</i> | DSM 21142T LGL | <i>M. bovoculi</i> | Present  | Ocular         |
| 57855   | Ohio      | <i>M. bovoculi</i>  | <i>M. bovoculi</i> | 2.36              | DSM 21142T LGL | <i>M. bovoculi</i> | DSM 21142T LGL | <i>M. bovoculi</i> | Present  | Ocular         |
| 57857   | Texas     | <i>M. bovoculi</i>  | <i>M. bovoculi</i> | 2.41              | DSM 21142T LGL | <i>M. bovoculi</i> | DSM 21142T LGL | <i>M. bovoculi</i> | Present  | Ocular         |
| 58064   | Nebraska  | <i>M. bovoculi</i>  | <i>M. bovoculi</i> | 2.5               | DSM 21142T LGL | <i>M. bovoculi</i> | DSM 21142T LGL | <i>M. bovoculi</i> | Present  | Ocular         |
| 58065   | Indiana   | <i>M. bovoculi</i>  | <i>M. bovoculi</i> | 2.32              | DSM 21142T LGL | <i>M. bovoculi</i> | DSM 21142T LGL | <i>M. bovoculi</i> | Present  | Ocular         |
| 58066   | Nebraska  | <i>M. bovoculi</i>  | <i>M. bovoculi</i> | 2.44              | DSM 21142T LGL | <i>M. bovoculi</i> | DSM 21142T LGL | <i>M. bovoculi</i> | Present  | Ocular         |
| 58067   | Nebraska  | <i>M. bovoculi</i>  | <i>M. bovoculi</i> | 2.39              | DSM 21142T LGL | <i>M. bovoculi</i> | DSM 21142T LGL | <i>M. bovoculi</i> | Present  | Ocular         |
| 58068   | Nebraska  | <i>M. bovoculi</i>  | <i>M. bovoculi</i> | 2.4               | DSM 21142T LGL | <i>M. bovoculi</i> | DSM 21142T LGL | <i>M. bovoculi</i> | Present  | Ocular         |
| 58069   | Nebraska  | <i>M. bovoculi</i>  | <i>M. bovoculi</i> | 2.5               | DSM 21142T LGL | <i>M. bovoculi</i> | DSM 21142T LGL | <i>M. bovoculi</i> | Present  | Ocular         |
| 58070   | Nebraska  | <i>M. bovoculi</i>  | <i>M. bovoculi</i> | 2.31              | DSM 21142T LGL | <i>M. bovoculi</i> | DSM 21142T LGL | <i>M. bovoculi</i> | Present  | Ocular         |
| 58071   | Nebraska  | <i>M. bovoculi</i>  | <i>M. bovoculi</i> | 2.48              | DSM 21142T LGL | <i>M. bovoculi</i> | DSM 21142T LGL | <i>M. bovoculi</i> | Present  | Ocular         |

| Isolate | State        | Sequencing results* | UNLVDC ID          | UNLVDC top score† | UNLVDC match‡  | BDAL MALDI ID      | BDAL match‡    | PCR-RFLP           | Disease§ | Site of origin |
|---------|--------------|---------------------|--------------------|-------------------|----------------|--------------------|----------------|--------------------|----------|----------------|
| 22581   | Missouri     | <i>M. bovoculi</i>  | <i>M. bovoculi</i> | 2.6               | 23343          | <i>M. bovoculi</i> | DSM 21142T LGL | <i>M. bovis</i>    | Absent   | Nasopharynx    |
| 23343   | Tennessee    | <i>M. bovoculi</i>  | <i>M. bovoculi</i> | 2.6               | 23343          | <i>M. bovoculi</i> | DSM 21142T LGL | <i>M. bovis</i>    | Absent   | Nasopharynx    |
| 28389   | Kentucky     | <i>M. bovoculi</i>  | <i>M. bovoculi</i> | 2.55              | 23343          | <i>M. bovoculi</i> | DSM 21142T LGL | <i>M. bovis</i>    | Absent   | Nasopharynx    |
| 33362   | Kansas       | <i>M. bovoculi</i>  | <i>M. bovoculi</i> | 2.58              | 23343          | <i>M. bovoculi</i> | DSM 21142T LGL | <i>M. bovis</i>    | Absent   | Nasopharynx    |
| 57850   | Nebraska     | <i>M. bovoculi</i>  | <i>M. bovoculi</i> | 2.52              | DSM 21142T LGL | <i>M. bovoculi</i> | DSM 21142T LGL | <i>M. bovoculi</i> | Present  | Ocular         |
| 57851   | Montana      | <i>M. bovoculi</i>  | <i>M. bovoculi</i> | 2.42              | DSM 21142T LGL | <i>M. bovoculi</i> | DSM 21142T LGL | <i>M. bovoculi</i> | Present  | Ocular         |
| 57852   | Nebraska     | <i>M. bovoculi</i>  | <i>M. bovoculi</i> | 2.47              | DSM 21142T LGL | <i>M. bovoculi</i> | DSM 21142T LGL | <i>M. bovoculi</i> | Present  | Swab           |
| 57853   | Nebraska     | <i>M. bovoculi</i>  | <i>M. bovoculi</i> | 2.36              | DSM 21142T LGL | <i>M. bovoculi</i> | DSM 21142T LGL | <i>M. bovoculi</i> | Present  | Ocular         |
| 57854   | Nebraska     | <i>M. bovoculi</i>  | <i>M. bovoculi</i> | 2.31              | DSM 21142T LGL | <i>M. bovoculi</i> | DSM 21142T LGL | <i>M. bovoculi</i> | Present  | Ocular         |
| 57855   | Ohio         | <i>M. bovoculi</i>  | <i>M. bovoculi</i> | 2.36              | DSM 21142T LGL | <i>M. bovoculi</i> | DSM 21142T LGL | <i>M. bovoculi</i> | Present  | Ocular         |
| 57857   | Texas        | <i>M. bovoculi</i>  | <i>M. bovoculi</i> | 2.41              | DSM 21142T LGL | <i>M. bovoculi</i> | DSM 21142T LGL | <i>M. bovoculi</i> | Present  | Ocular         |
| 58072   | Nebraska     | <i>M. bovoculi</i>  | <i>M. bovoculi</i> | 2.43              | DSM 21142T LGL | <i>M. bovoculi</i> | DSM 21142T LGL | <i>M. bovoculi</i> | Present  | Ocular         |
| 58073   | Nebraska     | <i>M. bovoculi</i>  | <i>M. bovoculi</i> | 2.45              | DSM 21142T LGL | <i>M. bovoculi</i> | DSM 21142T LGL | <i>M. bovoculi</i> | Present  | Ocular         |
| 58074   | Nebraska     | <i>M. bovoculi</i>  | <i>M. bovoculi</i> | 2.58              | DSM 21142T LGL | <i>M. bovoculi</i> | DSM 21142T LGL | <i>M. bovoculi</i> | Present  | Ocular         |
| 58075   | Nebraska     | <i>M. bovoculi</i>  | <i>M. bovoculi</i> | 2.42              | ATCC 19575 New | <i>M. bovoculi</i> | DSM 21142T LGL | <i>M. bovoculi</i> | Present  | Ocular         |
| 58076   | Nebraska     | <i>M. bovoculi</i>  | <i>M. bovoculi</i> | 2.44              | DSM 21142T LGL | <i>M. bovoculi</i> | DSM 21142T LGL | <i>M. bovoculi</i> | Present  | Ocular         |
| 58078   | South Dakota | <i>M. bovoculi</i>  | <i>M. bovoculi</i> | 2.45              | DSM 21142T LGL | <i>M. bovoculi</i> | DSM 21142T LGL | <i>M. bovoculi</i> | Present  | Ocular         |
| 58079   | Kansas       | <i>M. bovoculi</i>  | <i>M. bovoculi</i> | 2.36              | DSM 21142T LGL | <i>M. bovoculi</i> | DSM 21142T LGL | <i>M. bovoculi</i> | Present  | Ocular         |
| 58080   | Minnesota    | <i>M. bovoculi</i>  | <i>M. bovoculi</i> | 2.5               | DSM 21142T LGL | <i>M. bovoculi</i> | DSM 21142T LGL | <i>M. bovoculi</i> | Present  | Ocular         |

| Isolate | State         | Sequencing results* | UNLVDC ID          | UNLVDC top score† | UNLVDC match‡  | BDAL MALDI ID      | BDAL match‡    | PCR-RFLP           | Disease§ | Site of origin    |
|---------|---------------|---------------------|--------------------|-------------------|----------------|--------------------|----------------|--------------------|----------|-------------------|
| 22581   | Missouri      | <i>M. bovoculi</i>  | <i>M. bovoculi</i> | 2.6               | 23343          | <i>M. bovoculi</i> | DSM 21142T LGL | <i>M. bovis</i>    | Absent   | Nasopharynx       |
| 23343   | Tennessee     | <i>M. bovoculi</i>  | <i>M. bovoculi</i> | 2.6               | 23343          | <i>M. bovoculi</i> | DSM 21142T LGL | <i>M. bovis</i>    | Absent   | Nasopharynx       |
| 28389   | Kentucky      | <i>M. bovoculi</i>  | <i>M. bovoculi</i> | 2.55              | 23343          | <i>M. bovoculi</i> | DSM 21142T LGL | <i>M. bovis</i>    | Absent   | Nasopharynx       |
| 33362   | Kansas        | <i>M. bovoculi</i>  | <i>M. bovoculi</i> | 2.58              | 23343          | <i>M. bovoculi</i> | DSM 21142T LGL | <i>M. bovis</i>    | Absent   | Nasopharynx       |
| 57850   | Nebraska      | <i>M. bovoculi</i>  | <i>M. bovoculi</i> | 2.52              | DSM 21142T LGL | <i>M. bovoculi</i> | DSM 21142T LGL | <i>M. bovoculi</i> | Present  | Ocular            |
| 57851   | Montana       | <i>M. bovoculi</i>  | <i>M. bovoculi</i> | 2.42              | DSM 21142T LGL | <i>M. bovoculi</i> | DSM 21142T LGL | <i>M. bovoculi</i> | Present  | Ocular            |
| 57852   | Nebraska      | <i>M. bovoculi</i>  | <i>M. bovoculi</i> | 2.47              | DSM 21142T LGL | <i>M. bovoculi</i> | DSM 21142T LGL | <i>M. bovoculi</i> | Present  | Swab              |
| 57853   | Nebraska      | <i>M. bovoculi</i>  | <i>M. bovoculi</i> | 2.36              | DSM 21142T LGL | <i>M. bovoculi</i> | DSM 21142T LGL | <i>M. bovoculi</i> | Present  | Ocular            |
| 57854   | Nebraska      | <i>M. bovoculi</i>  | <i>M. bovoculi</i> | 2.31              | DSM 21142T LGL | <i>M. bovoculi</i> | DSM 21142T LGL | <i>M. bovoculi</i> | Present  | Ocular            |
| 57855   | Ohio          | <i>M. bovoculi</i>  | <i>M. bovoculi</i> | 2.36              | DSM 21142T LGL | <i>M. bovoculi</i> | DSM 21142T LGL | <i>M. bovoculi</i> | Present  | Ocular            |
| 57857   | Texas         | <i>M. bovoculi</i>  | <i>M. bovoculi</i> | 2.41              | DSM 21142T LGL | <i>M. bovoculi</i> | DSM 21142T LGL | <i>M. bovoculi</i> | Present  | Ocular            |
| 58081   | Minnesota     | <i>M. bovoculi</i>  | <i>M. bovoculi</i> | 2.51              | DSM 21142T LGL | <i>M. bovoculi</i> | DSM 21142T LGL | <i>M. bovis</i>    | Present  | Ocular            |
| 58082   | Montana       | <i>M. bovoculi</i>  | <i>M. bovoculi</i> | 2.35              | DSM 21142T LGL | <i>M. bovoculi</i> | DSM 21142T LGL | <i>M. bovoculi</i> | Present  | Ocular            |
| 58083   | Nebraska      | <i>M. bovoculi</i>  | <i>M. bovoculi</i> | 2.43              | DSM 21142T LGL | <i>M. bovoculi</i> | DSM 21142T LGL | <i>M. bovoculi</i> | Present  | Bacterial Isolate |
| 58084   | Nebraska      | <i>M. bovoculi</i>  | <i>M. bovoculi</i> | 2.46              | DSM 21142T LGL | <i>M. bovoculi</i> | DSM 21142T LGL | <i>M. bovoculi</i> | Present  | Ocular            |
| 58085   | Nebraska      | <i>M. bovoculi</i>  | <i>M. bovoculi</i> | 2.48              | DSM 21142T LGL | <i>M. bovoculi</i> | DSM 21142T LGL | <i>M. bovoculi</i> | Present  | Ocular            |
| 58086   | Virginia      | <i>M. bovoculi</i>  | <i>M. bovoculi</i> | 2.41              | DSM 21142T LGL | <i>M. bovoculi</i> | DSM 21142T LGL | <i>M. bovoculi</i> | Present  | Ocular            |
| 58087   | West Virginia | <i>M. bovoculi</i>  | <i>M. bovoculi</i> | 2.46              | DSM 21142T LGL | <i>M. bovoculi</i> | DSM 21142T LGL | <i>M. bovoculi</i> | Present  | Ocular            |
| 58088   | Minnesota     | <i>M. bovoculi</i>  | <i>M. bovoculi</i> | 2.44              | DSM 21142T LGL | <i>M. bovoculi</i> | DSM 21142T LGL | <i>M. bovoculi</i> | Present  | Ocular            |

| Isolate | State          | Sequencing results* | UNLVDC ID          | UNLVDC top score† | UNLVDC match‡  | BDAL MALDI ID      | BDAL match‡    | PCR-RFLP           | Disease§ | Site of origin |
|---------|----------------|---------------------|--------------------|-------------------|----------------|--------------------|----------------|--------------------|----------|----------------|
| 22581   | Missouri       | <i>M. bovoculi</i>  | <i>M. bovoculi</i> | 2.6               | 23343          | <i>M. bovoculi</i> | DSM 21142T LGL | <i>M. bovis</i>    | Absent   | Nasopharynx    |
| 23343   | Tennessee      | <i>M. bovoculi</i>  | <i>M. bovoculi</i> | 2.6               | 23343          | <i>M. bovoculi</i> | DSM 21142T LGL | <i>M. bovis</i>    | Absent   | Nasopharynx    |
| 28389   | Kentucky       | <i>M. bovoculi</i>  | <i>M. bovoculi</i> | 2.55              | 23343          | <i>M. bovoculi</i> | DSM 21142T LGL | <i>M. bovis</i>    | Absent   | Nasopharynx    |
| 33362   | Kansas         | <i>M. bovoculi</i>  | <i>M. bovoculi</i> | 2.58              | 23343          | <i>M. bovoculi</i> | DSM 21142T LGL | <i>M. bovis</i>    | Absent   | Nasopharynx    |
| 57850   | Nebraska       | <i>M. bovoculi</i>  | <i>M. bovoculi</i> | 2.52              | DSM 21142T LGL | <i>M. bovoculi</i> | DSM 21142T LGL | <i>M. bovoculi</i> | Present  | Ocular         |
| 57851   | Montana        | <i>M. bovoculi</i>  | <i>M. bovoculi</i> | 2.42              | DSM 21142T LGL | <i>M. bovoculi</i> | DSM 21142T LGL | <i>M. bovoculi</i> | Present  | Ocular         |
| 57852   | Nebraska       | <i>M. bovoculi</i>  | <i>M. bovoculi</i> | 2.47              | DSM 21142T LGL | <i>M. bovoculi</i> | DSM 21142T LGL | <i>M. bovoculi</i> | Present  | Swab           |
| 57853   | Nebraska       | <i>M. bovoculi</i>  | <i>M. bovoculi</i> | 2.36              | DSM 21142T LGL | <i>M. bovoculi</i> | DSM 21142T LGL | <i>M. bovoculi</i> | Present  | Ocular         |
| 57854   | Nebraska       | <i>M. bovoculi</i>  | <i>M. bovoculi</i> | 2.31              | DSM 21142T LGL | <i>M. bovoculi</i> | DSM 21142T LGL | <i>M. bovoculi</i> | Present  | Ocular         |
| 57855   | Ohio           | <i>M. bovoculi</i>  | <i>M. bovoculi</i> | 2.36              | DSM 21142T LGL | <i>M. bovoculi</i> | DSM 21142T LGL | <i>M. bovoculi</i> | Present  | Ocular         |
| 57857   | Texas          | <i>M. bovoculi</i>  | <i>M. bovoculi</i> | 2.41              | DSM 21142T LGL | <i>M. bovoculi</i> | DSM 21142T LGL | <i>M. bovoculi</i> | Present  | Ocular         |
| 58090   | Illinois       | <i>M. bovoculi</i>  | <i>M. bovoculi</i> | 2.43              | DSM 21142T LGL | <i>M. bovoculi</i> | DSM 21142T LGL | <i>M. bovoculi</i> | Present  | Ocular         |
| 58091   | Nebraska       | <i>M. bovoculi</i>  | <i>M. bovoculi</i> | 2.28              | DSM 21142T LGL | <i>M. bovoculi</i> | DSM 21142T LGL | <i>M. bovoculi</i> | Present  | Ocular         |
| 58092   | Nebraska       | <i>M. bovoculi</i>  | <i>M. bovoculi</i> | 2.43              | DSM 21142T LGL | <i>M. bovoculi</i> | DSM 21142T LGL | <i>M. bovoculi</i> | Present  | Ocular         |
| 58093   | Nebraska       | <i>M. bovoculi</i>  | <i>M. bovoculi</i> | 2.22              | DSM 21142T LGL | <i>M. bovoculi</i> | DSM 21142T LGL | <i>M. bovoculi</i> | Present  | Ocular         |
| 58094   | Nebraska       | <i>M. bovoculi</i>  | <i>M. bovoculi</i> | 2.49              | DSM 21142T LGL | <i>M. bovoculi</i> | DSM 21142T LGL | <i>M. bovoculi</i> | Present  | Ocular         |
| 58095   | Nebraska       | <i>M. bovoculi</i>  | <i>M. bovoculi</i> | 2.32              | DSM 21142T LGL | <i>M. bovoculi</i> | DSM 21142T LGL | <i>M. bovoculi</i> | Present  | Ocular         |
| 58096   | Nebraska       | <i>M. bovoculi</i>  | <i>M. bovoculi</i> | 2.32              | DSM 21142T LGL | <i>M. bovoculi</i> | DSM 21142T LGL | <i>M. bovoculi</i> | Present  | Ocular         |
| 58097   | South Carolina | <i>M. bovoculi</i>  | <i>M. bovoculi</i> | 2.45              | DSM 21142T LGL | <i>M. bovoculi</i> | DSM 21142T LGL | <i>M. bovoculi</i> | Present  | Ocular         |

| Isolate | State        | Sequencing results* | UNLVDC ID          | UNLVDC top score† | UNLVDC match‡  | BDAL MALDI ID      | BDAL match‡    | PCR-RFLP           | Disease§ | Site of origin |
|---------|--------------|---------------------|--------------------|-------------------|----------------|--------------------|----------------|--------------------|----------|----------------|
| 22581   | Missouri     | <i>M. bovoculi</i>  | <i>M. bovoculi</i> | 2.6               | 23343          | <i>M. bovoculi</i> | DSM 21142T LGL | <i>M. bovis</i>    | Absent   | Nasopharynx    |
| 23343   | Tennessee    | <i>M. bovoculi</i>  | <i>M. bovoculi</i> | 2.6               | 23343          | <i>M. bovoculi</i> | DSM 21142T LGL | <i>M. bovis</i>    | Absent   | Nasopharynx    |
| 28389   | Kentucky     | <i>M. bovoculi</i>  | <i>M. bovoculi</i> | 2.55              | 23343          | <i>M. bovoculi</i> | DSM 21142T LGL | <i>M. bovis</i>    | Absent   | Nasopharynx    |
| 33362   | Kansas       | <i>M. bovoculi</i>  | <i>M. bovoculi</i> | 2.58              | 23343          | <i>M. bovoculi</i> | DSM 21142T LGL | <i>M. bovis</i>    | Absent   | Nasopharynx    |
| 57850   | Nebraska     | <i>M. bovoculi</i>  | <i>M. bovoculi</i> | 2.52              | DSM 21142T LGL | <i>M. bovoculi</i> | DSM 21142T LGL | <i>M. bovoculi</i> | Present  | Ocular         |
| 57851   | Montana      | <i>M. bovoculi</i>  | <i>M. bovoculi</i> | 2.42              | DSM 21142T LGL | <i>M. bovoculi</i> | DSM 21142T LGL | <i>M. bovoculi</i> | Present  | Ocular         |
| 57852   | Nebraska     | <i>M. bovoculi</i>  | <i>M. bovoculi</i> | 2.47              | DSM 21142T LGL | <i>M. bovoculi</i> | DSM 21142T LGL | <i>M. bovoculi</i> | Present  | Swab           |
| 57853   | Nebraska     | <i>M. bovoculi</i>  | <i>M. bovoculi</i> | 2.36              | DSM 21142T LGL | <i>M. bovoculi</i> | DSM 21142T LGL | <i>M. bovoculi</i> | Present  | Ocular         |
| 57854   | Nebraska     | <i>M. bovoculi</i>  | <i>M. bovoculi</i> | 2.31              | DSM 21142T LGL | <i>M. bovoculi</i> | DSM 21142T LGL | <i>M. bovoculi</i> | Present  | Ocular         |
| 57855   | Ohio         | <i>M. bovoculi</i>  | <i>M. bovoculi</i> | 2.36              | DSM 21142T LGL | <i>M. bovoculi</i> | DSM 21142T LGL | <i>M. bovoculi</i> | Present  | Ocular         |
| 57857   | Texas        | <i>M. bovoculi</i>  | <i>M. bovoculi</i> | 2.41              | DSM 21142T LGL | <i>M. bovoculi</i> | DSM 21142T LGL | <i>M. bovoculi</i> | Present  | Ocular         |
| 58099   | Wyoming      | <i>M. bovoculi</i>  | <i>M. bovoculi</i> | 2.34              | DSM 21142T LGL | <i>M. bovoculi</i> | DSM 21142T LGL | <i>M. bovoculi</i> | Present  | Ocular         |
| 58101   | Ohio         | <i>M. bovoculi</i>  | <i>M. bovoculi</i> | 2.35              | DSM 21142T LGL | <i>M. bovoculi</i> | DSM 21142T LGL | <i>M. bovoculi</i> | Present  | Ocular         |
| 58102   | Nebraska     | <i>M. bovoculi</i>  | <i>M. bovoculi</i> | 2.43              | DSM 21142T LGL | <i>M. bovoculi</i> | DSM 21142T LGL | <i>M. bovoculi</i> | Present  | Ocular         |
| 58103   | Virginia     | <i>M. bovoculi</i>  | <i>M. bovoculi</i> | 2.4               | DSM 21142T LGL | <i>M. bovoculi</i> | DSM 21142T LGL | <i>M. bovoculi</i> | Present  | Ocular         |
| 58107   | South Dakota | <i>M. bovoculi</i>  | <i>M. bovoculi</i> | 2.3               | DSM 21142T LGL | <i>M. bovoculi</i> | DSM 21142T LGL | <i>M. bovoculi</i> | Present  | Ocular         |
| 58108   | Nebraska     | <i>M. bovoculi</i>  | <i>M. bovoculi</i> | 2.41              | DSM 21142T LGL | <i>M. bovoculi</i> | DSM 21142T LGL | <i>M. bovoculi</i> | Present  | Ocular         |
| 58111   | Virginia     | <i>M. bovoculi</i>  | <i>M. bovoculi</i> | 2.4               | DSM 21142T LGL | <i>M. bovoculi</i> | DSM 21142T LGL | <i>M. bovis</i>    | Present  | Ocular         |
| 58118   | Nebraska     | <i>M. bovoculi</i>  | <i>M. bovoculi</i> | 2.6               | DSM 21142T LGL | <i>M. bovoculi</i> | DSM 21142T LGL | <i>M. bovoculi</i> | Present  | Ocular         |

| Isolate | State     | Sequencing results* | UNLVDC ID          | UNLVDC top score† | UNLVDC match‡  | BDAL MALDI ID      | BDAL match‡    | PCR-RFLP           | Disease§ | Site of origin |
|---------|-----------|---------------------|--------------------|-------------------|----------------|--------------------|----------------|--------------------|----------|----------------|
| 22581   | Missouri  | <i>M. bovoculi</i>  | <i>M. bovoculi</i> | 2.6               | 23343          | <i>M. bovoculi</i> | DSM 21142T LGL | <i>M. bovis</i>    | Absent   | Nasopharynx    |
| 23343   | Tennessee | <i>M. bovoculi</i>  | <i>M. bovoculi</i> | 2.6               | 23343          | <i>M. bovoculi</i> | DSM 21142T LGL | <i>M. bovis</i>    | Absent   | Nasopharynx    |
| 28389   | Kentucky  | <i>M. bovoculi</i>  | <i>M. bovoculi</i> | 2.55              | 23343          | <i>M. bovoculi</i> | DSM 21142T LGL | <i>M. bovis</i>    | Absent   | Nasopharynx    |
| 33362   | Kansas    | <i>M. bovoculi</i>  | <i>M. bovoculi</i> | 2.58              | 23343          | <i>M. bovoculi</i> | DSM 21142T LGL | <i>M. bovis</i>    | Absent   | Nasopharynx    |
| 57850   | Nebraska  | <i>M. bovoculi</i>  | <i>M. bovoculi</i> | 2.52              | DSM 21142T LGL | <i>M. bovoculi</i> | DSM 21142T LGL | <i>M. bovoculi</i> | Present  | Ocular         |
| 57851   | Montana   | <i>M. bovoculi</i>  | <i>M. bovoculi</i> | 2.42              | DSM 21142T LGL | <i>M. bovoculi</i> | DSM 21142T LGL | <i>M. bovoculi</i> | Present  | Ocular         |
| 57852   | Nebraska  | <i>M. bovoculi</i>  | <i>M. bovoculi</i> | 2.47              | DSM 21142T LGL | <i>M. bovoculi</i> | DSM 21142T LGL | <i>M. bovoculi</i> | Present  | Swab           |
| 57853   | Nebraska  | <i>M. bovoculi</i>  | <i>M. bovoculi</i> | 2.36              | DSM 21142T LGL | <i>M. bovoculi</i> | DSM 21142T LGL | <i>M. bovoculi</i> | Present  | Ocular         |
| 57854   | Nebraska  | <i>M. bovoculi</i>  | <i>M. bovoculi</i> | 2.31              | DSM 21142T LGL | <i>M. bovoculi</i> | DSM 21142T LGL | <i>M. bovoculi</i> | Present  | Ocular         |
| 57855   | Ohio      | <i>M. bovoculi</i>  | <i>M. bovoculi</i> | 2.36              | DSM 21142T LGL | <i>M. bovoculi</i> | DSM 21142T LGL | <i>M. bovoculi</i> | Present  | Ocular         |
| 57857   | Texas     | <i>M. bovoculi</i>  | <i>M. bovoculi</i> | 2.41              | DSM 21142T LGL | <i>M. bovoculi</i> | DSM 21142T LGL | <i>M. bovoculi</i> | Present  | Ocular         |
| 58119   | Nebraska  | <i>M. bovoculi</i>  | <i>M. bovoculi</i> | 2.49              | DSM 21142T LGL | <i>M. bovoculi</i> | DSM 21142T LGL | <i>M. bovoculi</i> | Present  | Ocular         |
| 58121   | Nebraska  | <i>M. bovoculi</i>  | <i>M. bovoculi</i> | 2.51              | DSM 21142T LGL | <i>M. bovoculi</i> | DSM 21142T LGL | <i>M. bovoculi</i> | Present  | Ocular         |
| 58122   | Nebraska  | <i>M. bovoculi</i>  | <i>M. bovoculi</i> | 2.38              | ATCC 19575 New | <i>M. bovoculi</i> | DSM 21142T LGL | <i>M. bovoculi</i> | Present  | Ocular         |
| 58123   | Iowa      | <i>M. bovoculi</i>  | <i>M. bovoculi</i> | 2.41              | ATCC 19575 New | <i>M. bovoculi</i> | DSM 21142T LGL | <i>M. bovoculi</i> | Present  | Ocular         |
| 60475   | Nebraska  | <i>M. bovoculi</i>  | <i>M. bovoculi</i> | 2.39              | DSM 21142T LGL | <i>M. bovoculi</i> | DSM 21142T LGL | <i>M. bovoculi</i> | Absent   | Ocular         |
| 60476   | Nebraska  | <i>M. bovoculi</i>  | <i>M. bovoculi</i> | 2.37              | ATCC 19575 New | <i>M. bovoculi</i> | DSM 21142T LGL | <i>M. bovoculi</i> | Absent   | Ocular         |
| 60477   | Nebraska  | <i>M. bovoculi</i>  | <i>M. bovoculi</i> | 2.33              | DSM 21142T LGL | <i>M. bovoculi</i> | DSM 21142T LGL | <i>M. bovoculi</i> | Absent   | Ocular         |
| 60478   | Nebraska  | <i>M. bovoculi</i>  | <i>M. bovoculi</i> | 2.36              | DSM 21142T LGL | <i>M. bovoculi</i> | DSM 21142T LGL | <i>M. bovoculi</i> | Absent   | Ocular         |

| Isolate | State     | Sequencing results* | UNLVDC ID          | UNLVDC top score† | UNLVDC match‡  | BDAL MALDI ID      | BDAL match‡    | PCR-RFLP           | Disease§ | Site of origin |
|---------|-----------|---------------------|--------------------|-------------------|----------------|--------------------|----------------|--------------------|----------|----------------|
| 22581   | Missouri  | <i>M. bovoculi</i>  | <i>M. bovoculi</i> | 2.6               | 23343          | <i>M. bovoculi</i> | DSM 21142T LGL | <i>M. bovis</i>    | Absent   | Nasopharynx    |
| 23343   | Tennessee | <i>M. bovoculi</i>  | <i>M. bovoculi</i> | 2.6               | 23343          | <i>M. bovoculi</i> | DSM 21142T LGL | <i>M. bovis</i>    | Absent   | Nasopharynx    |
| 28389   | Kentucky  | <i>M. bovoculi</i>  | <i>M. bovoculi</i> | 2.55              | 23343          | <i>M. bovoculi</i> | DSM 21142T LGL | <i>M. bovis</i>    | Absent   | Nasopharynx    |
| 33362   | Kansas    | <i>M. bovoculi</i>  | <i>M. bovoculi</i> | 2.58              | 23343          | <i>M. bovoculi</i> | DSM 21142T LGL | <i>M. bovis</i>    | Absent   | Nasopharynx    |
| 57850   | Nebraska  | <i>M. bovoculi</i>  | <i>M. bovoculi</i> | 2.52              | DSM 21142T LGL | <i>M. bovoculi</i> | DSM 21142T LGL | <i>M. bovoculi</i> | Present  | Ocular         |
| 57851   | Montana   | <i>M. bovoculi</i>  | <i>M. bovoculi</i> | 2.42              | DSM 21142T LGL | <i>M. bovoculi</i> | DSM 21142T LGL | <i>M. bovoculi</i> | Present  | Ocular         |
| 57852   | Nebraska  | <i>M. bovoculi</i>  | <i>M. bovoculi</i> | 2.47              | DSM 21142T LGL | <i>M. bovoculi</i> | DSM 21142T LGL | <i>M. bovoculi</i> | Present  | Swab           |
| 57853   | Nebraska  | <i>M. bovoculi</i>  | <i>M. bovoculi</i> | 2.36              | DSM 21142T LGL | <i>M. bovoculi</i> | DSM 21142T LGL | <i>M. bovoculi</i> | Present  | Ocular         |
| 57854   | Nebraska  | <i>M. bovoculi</i>  | <i>M. bovoculi</i> | 2.31              | DSM 21142T LGL | <i>M. bovoculi</i> | DSM 21142T LGL | <i>M. bovoculi</i> | Present  | Ocular         |
| 57855   | Ohio      | <i>M. bovoculi</i>  | <i>M. bovoculi</i> | 2.36              | DSM 21142T LGL | <i>M. bovoculi</i> | DSM 21142T LGL | <i>M. bovoculi</i> | Present  | Ocular         |
| 57857   | Texas     | <i>M. bovoculi</i>  | <i>M. bovoculi</i> | 2.41              | DSM 21142T LGL | <i>M. bovoculi</i> | DSM 21142T LGL | <i>M. bovoculi</i> | Present  | Ocular         |
| 60479   | Nebraska  | <i>M. bovoculi</i>  | <i>M. bovoculi</i> | 2.3               | ATCC 19575 New | <i>M. bovoculi</i> | DSM 21142T LGL | <i>M. bovoculi</i> | Absent   | Ocular         |
| 68485   | Nebraska  | <i>M. bovoculi</i>  | <i>M. bovoculi</i> | 2.32              | DSM 21142T LGL | <i>M. bovoculi</i> | DSM 21142T LGL | <i>M. bovoculi</i> | Absent   | Ocular         |
| 68486   | Nebraska  | <i>M. bovoculi</i>  | <i>M. bovoculi</i> | 2.51              | DSM 21142T LGL | <i>M. bovoculi</i> | DSM 21142T LGL | <i>M. bovoculi</i> | Absent   | Ocular         |
| 68487   | Nebraska  | <i>M. bovoculi</i>  | <i>M. bovoculi</i> | 2.42              | DSM 21142T LGL | <i>M. bovoculi</i> | DSM 21142T LGL | <i>M. bovoculi</i> | Absent   | Ocular         |
| 68488   | Nebraska  | <i>M. bovoculi</i>  | <i>M. bovoculi</i> | 2.17              | DSM 21142T LGL | <i>M. bovoculi</i> | DSM 21142T LGL | <i>M. bovoculi</i> | Absent   | Ocular         |
| 68489   | Nebraska  | <i>M. bovoculi</i>  | <i>M. bovoculi</i> | 2.37              | DSM 21142T LGL | <i>M. bovoculi</i> | DSM 21142T LGL | <i>M. bovoculi</i> | Absent   | Ocular         |
| 68490   | Nebraska  | <i>M. bovoculi</i>  | <i>M. bovoculi</i> | 2.4               | DSM 21142T LGL | <i>M. bovoculi</i> | DSM 21142T LGL | <i>M. bovoculi</i> | Absent   | Ocular         |
| 68492   | Nebraska  | <i>M. bovoculi</i>  | <i>M. bovoculi</i> | 2.52              | DSM 21142T LGL | <i>M. bovoculi</i> | DSM 21142T LGL | <i>M. bovoculi</i> | Absent   | Ocular         |



| Isolate | State     | Sequencing results* | UNLVDC ID          | UNLVDC top score† | UNLVDC match‡  | BDAL MALDI ID           | BDAL match‡    | PCR-RFLP           | Disease§ | Site of origin |
|---------|-----------|---------------------|--------------------|-------------------|----------------|-------------------------|----------------|--------------------|----------|----------------|
| 22581   | Missouri  | <i>M. bovoculi</i>  | <i>M. bovoculi</i> | 2.6               | 23343          | <i>M. bovoculi</i>      | DSM 21142T LGL | <i>M. bovis</i>    | Absent   | Nasopharynx    |
| 23343   | Tennessee | <i>M. bovoculi</i>  | <i>M. bovoculi</i> | 2.6               | 23343          | <i>M. bovoculi</i>      | DSM 21142T LGL | <i>M. bovis</i>    | Absent   | Nasopharynx    |
| 28389   | Kentucky  | <i>M. bovoculi</i>  | <i>M. bovoculi</i> | 2.55              | 23343          | <i>M. bovoculi</i>      | DSM 21142T LGL | <i>M. bovis</i>    | Absent   | Nasopharynx    |
| 33362   | Kansas    | <i>M. bovoculi</i>  | <i>M. bovoculi</i> | 2.58              | 23343          | <i>M. bovoculi</i>      | DSM 21142T LGL | <i>M. bovis</i>    | Absent   | Nasopharynx    |
| 57850   | Nebraska  | <i>M. bovoculi</i>  | <i>M. bovoculi</i> | 2.52              | DSM 21142T LGL | <i>M. bovoculi</i>      | DSM 21142T LGL | <i>M. bovoculi</i> | Present  | Ocular         |
| 57851   | Montana   | <i>M. bovoculi</i>  | <i>M. bovoculi</i> | 2.42              | DSM 21142T LGL | <i>M. bovoculi</i>      | DSM 21142T LGL | <i>M. bovoculi</i> | Present  | Ocular         |
| 57852   | Nebraska  | <i>M. bovoculi</i>  | <i>M. bovoculi</i> | 2.47              | DSM 21142T LGL | <i>M. bovoculi</i>      | DSM 21142T LGL | <i>M. bovoculi</i> | Present  | Swab           |
| 57853   | Nebraska  | <i>M. bovoculi</i>  | <i>M. bovoculi</i> | 2.36              | DSM 21142T LGL | <i>M. bovoculi</i>      | DSM 21142T LGL | <i>M. bovoculi</i> | Present  | Ocular         |
| 57854   | Nebraska  | <i>M. bovoculi</i>  | <i>M. bovoculi</i> | 2.31              | DSM 21142T LGL | <i>M. bovoculi</i>      | DSM 21142T LGL | <i>M. bovoculi</i> | Present  | Ocular         |
| 57855   | Ohio      | <i>M. bovoculi</i>  | <i>M. bovoculi</i> | 2.36              | DSM 21142T LGL | <i>M. bovoculi</i>      | DSM 21142T LGL | <i>M. bovoculi</i> | Present  | Ocular         |
| 57857   | Texas     | <i>M. bovoculi</i>  | <i>M. bovoculi</i> | 2.41              | DSM 21142T LGL | <i>M. bovoculi</i>      | DSM 21142T LGL | <i>M. bovoculi</i> | Present  | Ocular         |
| 68495   | Nebraska  | <i>M. bovoculi</i>  | <i>M. bovoculi</i> | 2.54              | 23343          | <i>Branhamella ovis</i> | DSM 18027T DSM | <i>M. bovis</i>    | Absent   | Ocular         |
| 68496   | Nebraska  | <i>M. bovoculi</i>  | <i>M. bovoculi</i> | 2.41              | DSM 21142T LGL | <i>M. bovoculi</i>      | DSM 21142T LGL | <i>M. bovoculi</i> | Absent   | Ocular         |
| 68499   | Nebraska  | <i>M. bovoculi</i>  | <i>M. bovoculi</i> | 2.6               | 23343          | <i>M. bovoculi</i>      | DSM 21142T LGL | <i>M. bovis</i>    | Absent   | Ocular         |
| 68500   | Nebraska  | <i>M. bovoculi</i>  | <i>M. bovoculi</i> | 2.54              | 23343          | <i>M. bovoculi</i>      | DSM 21142T LGL | <i>M. bovis</i>    | Absent   | Ocular         |
| 68502   | Nebraska  | <i>M. bovoculi</i>  | <i>M. bovoculi</i> | 2.6               | 23343          | <i>M. bovoculi</i>      | DSM 21142T LGL | <i>M. bovis</i>    | Absent   | Ocular         |
| 68503   | Nebraska  | <i>M. bovoculi</i>  | <i>M. bovoculi</i> | 2.45              | 23343          | <i>M. bovoculi</i>      | DSM 21142T LGL | <i>M. bovis</i>    | Absent   | Ocular         |
| 68504   | Nebraska  | <i>M. bovoculi</i>  | <i>M. bovoculi</i> | 2.56              | 23343          | <i>M. bovoculi</i>      | DSM 21142T LGL | <i>M. bovis</i>    | Absent   | Ocular         |
| 68505   | Nebraska  | <i>M. bovoculi</i>  | <i>M. bovoculi</i> | 2.57              | 23343          | <i>M. bovoculi</i>      | DSM 21142T LGL | <i>M. bovis</i>    | Absent   | Ocular         |

| Isolate | State     | Sequencing results* | UNLVDC ID          | UNLVDC top score† | UNLVDC match‡  | BDAL MALDI ID      | BDAL match‡    | PCR-RFLP           | Disease§ | Site of origin |
|---------|-----------|---------------------|--------------------|-------------------|----------------|--------------------|----------------|--------------------|----------|----------------|
| 22581   | Missouri  | <i>M. bovoculi</i>  | <i>M. bovoculi</i> | 2.6               | 23343          | <i>M. bovoculi</i> | DSM 21142T LGL | <i>M. bovis</i>    | Absent   | Nasopharynx    |
| 23343   | Tennessee | <i>M. bovoculi</i>  | <i>M. bovoculi</i> | 2.6               | 23343          | <i>M. bovoculi</i> | DSM 21142T LGL | <i>M. bovis</i>    | Absent   | Nasopharynx    |
| 28389   | Kentucky  | <i>M. bovoculi</i>  | <i>M. bovoculi</i> | 2.55              | 23343          | <i>M. bovoculi</i> | DSM 21142T LGL | <i>M. bovis</i>    | Absent   | Nasopharynx    |
| 33362   | Kansas    | <i>M. bovoculi</i>  | <i>M. bovoculi</i> | 2.58              | 23343          | <i>M. bovoculi</i> | DSM 21142T LGL | <i>M. bovis</i>    | Absent   | Nasopharynx    |
| 57850   | Nebraska  | <i>M. bovoculi</i>  | <i>M. bovoculi</i> | 2.52              | DSM 21142T LGL | <i>M. bovoculi</i> | DSM 21142T LGL | <i>M. bovoculi</i> | Present  | Ocular         |
| 57851   | Montana   | <i>M. bovoculi</i>  | <i>M. bovoculi</i> | 2.42              | DSM 21142T LGL | <i>M. bovoculi</i> | DSM 21142T LGL | <i>M. bovoculi</i> | Present  | Ocular         |
| 57852   | Nebraska  | <i>M. bovoculi</i>  | <i>M. bovoculi</i> | 2.47              | DSM 21142T LGL | <i>M. bovoculi</i> | DSM 21142T LGL | <i>M. bovoculi</i> | Present  | Swab           |
| 57853   | Nebraska  | <i>M. bovoculi</i>  | <i>M. bovoculi</i> | 2.36              | DSM 21142T LGL | <i>M. bovoculi</i> | DSM 21142T LGL | <i>M. bovoculi</i> | Present  | Ocular         |
| 57854   | Nebraska  | <i>M. bovoculi</i>  | <i>M. bovoculi</i> | 2.31              | DSM 21142T LGL | <i>M. bovoculi</i> | DSM 21142T LGL | <i>M. bovoculi</i> | Present  | Ocular         |
| 57855   | Ohio      | <i>M. bovoculi</i>  | <i>M. bovoculi</i> | 2.36              | DSM 21142T LGL | <i>M. bovoculi</i> | DSM 21142T LGL | <i>M. bovoculi</i> | Present  | Ocular         |
| 57857   | Texas     | <i>M. bovoculi</i>  | <i>M. bovoculi</i> | 2.41              | DSM 21142T LGL | <i>M. bovoculi</i> | DSM 21142T LGL | <i>M. bovoculi</i> | Present  | Ocular         |
| 68506   | Nebraska  | <i>M. bovoculi</i>  | <i>M. bovoculi</i> | 2.48              | DSM 21142T LGL | <i>M. bovoculi</i> | DSM 21142T LGL | <i>M. bovoculi</i> | Absent   | Ocular         |
| 68507   | Nebraska  | <i>M. bovoculi</i>  | <i>M. bovoculi</i> | 2.44              | DSM 21142T LGL | <i>M. bovoculi</i> | DSM 21142T LGL | <i>M. bovoculi</i> | Absent   | Ocular         |
| 68508   | Nebraska  | <i>M. bovoculi</i>  | <i>M. bovoculi</i> | 2.27              | DSM 21142T LGL | <i>M. bovoculi</i> | DSM 21142T LGL | <i>M. bovoculi</i> | Absent   | Ocular         |
| 68510   | Nebraska  | <i>M. bovoculi</i>  | <i>M. bovoculi</i> | 2.39              | DSM 21142T LGL | <i>M. bovoculi</i> | DSM 21142T LGL | <i>M. bovoculi</i> | Absent   | Ocular         |
| 68511   | Nebraska  | <i>M. bovoculi</i>  | <i>M. bovoculi</i> | 2.44              | DSM 21142T LGL | <i>M. bovoculi</i> | DSM 21142T LGL | <i>M. bovoculi</i> | Absent   | Ocular         |
| 68512   | Nebraska  | <i>M. bovoculi</i>  | <i>M. bovoculi</i> | 2.41              | DSM 21142T LGL | <i>M. bovoculi</i> | DSM 21142T LGL | <i>M. bovoculi</i> | Absent   | Ocular         |
| 68513   | Nebraska  | <i>M. bovoculi</i>  | <i>M. bovoculi</i> | 2.37              | DSM 21142T LGL | <i>M. bovoculi</i> | DSM 21142T LGL | <i>M. bovoculi</i> | Absent   | Ocular         |
| 68514   | Nebraska  | <i>M. bovoculi</i>  | <i>M. bovoculi</i> | 2.49              | DSM 21142T LGL | <i>M. bovoculi</i> | DSM 21142T LGL | <i>M. bovoculi</i> | Absent   | Ocular         |

| Isolate | State     | Sequencing results* | UNLVDC ID          | UNLVDC top score† | UNLVDC match‡  | BDAL MALDI ID      | BDAL match‡    | PCR-RFLP           | Disease§ | Site of origin |
|---------|-----------|---------------------|--------------------|-------------------|----------------|--------------------|----------------|--------------------|----------|----------------|
| 22581   | Missouri  | <i>M. bovoculi</i>  | <i>M. bovoculi</i> | 2.6               | 23343          | <i>M. bovoculi</i> | DSM 21142T LGL | <i>M. bovis</i>    | Absent   | Nasopharynx    |
| 23343   | Tennessee | <i>M. bovoculi</i>  | <i>M. bovoculi</i> | 2.6               | 23343          | <i>M. bovoculi</i> | DSM 21142T LGL | <i>M. bovis</i>    | Absent   | Nasopharynx    |
| 28389   | Kentucky  | <i>M. bovoculi</i>  | <i>M. bovoculi</i> | 2.55              | 23343          | <i>M. bovoculi</i> | DSM 21142T LGL | <i>M. bovis</i>    | Absent   | Nasopharynx    |
| 33362   | Kansas    | <i>M. bovoculi</i>  | <i>M. bovoculi</i> | 2.58              | 23343          | <i>M. bovoculi</i> | DSM 21142T LGL | <i>M. bovis</i>    | Absent   | Nasopharynx    |
| 57850   | Nebraska  | <i>M. bovoculi</i>  | <i>M. bovoculi</i> | 2.52              | DSM 21142T LGL | <i>M. bovoculi</i> | DSM 21142T LGL | <i>M. bovoculi</i> | Present  | Ocular         |
| 57851   | Montana   | <i>M. bovoculi</i>  | <i>M. bovoculi</i> | 2.42              | DSM 21142T LGL | <i>M. bovoculi</i> | DSM 21142T LGL | <i>M. bovoculi</i> | Present  | Ocular         |
| 57852   | Nebraska  | <i>M. bovoculi</i>  | <i>M. bovoculi</i> | 2.47              | DSM 21142T LGL | <i>M. bovoculi</i> | DSM 21142T LGL | <i>M. bovoculi</i> | Present  | Swab           |
| 57853   | Nebraska  | <i>M. bovoculi</i>  | <i>M. bovoculi</i> | 2.36              | DSM 21142T LGL | <i>M. bovoculi</i> | DSM 21142T LGL | <i>M. bovoculi</i> | Present  | Ocular         |
| 57854   | Nebraska  | <i>M. bovoculi</i>  | <i>M. bovoculi</i> | 2.31              | DSM 21142T LGL | <i>M. bovoculi</i> | DSM 21142T LGL | <i>M. bovoculi</i> | Present  | Ocular         |
| 57855   | Ohio      | <i>M. bovoculi</i>  | <i>M. bovoculi</i> | 2.36              | DSM 21142T LGL | <i>M. bovoculi</i> | DSM 21142T LGL | <i>M. bovoculi</i> | Present  | Ocular         |
| 57857   | Texas     | <i>M. bovoculi</i>  | <i>M. bovoculi</i> | 2.41              | DSM 21142T LGL | <i>M. bovoculi</i> | DSM 21142T LGL | <i>M. bovoculi</i> | Present  | Ocular         |
| 68515   | Nebraska  | <i>M. bovoculi</i>  | <i>M. bovoculi</i> | 2.59              | 23343          | <i>M. bovoculi</i> | DSM 21142T LGL | <i>M. bovis</i>    | Absent   | Ocular         |
| 68516   | Nebraska  | <i>M. bovoculi</i>  | <i>M. bovoculi</i> | 2.55              | 23343          | <i>M. bovoculi</i> | DSM 21142T LGL | <i>M. bovis</i>    | Absent   | Ocular         |
| 68517   | Nebraska  | <i>M. bovoculi</i>  | <i>M. bovoculi</i> | 2.45              | DSM 21142T LGL | <i>M. bovoculi</i> | DSM 21142T LGL | <i>M. bovoculi</i> | Absent   | Ocular         |
| 68519   | Nebraska  | <i>M. bovoculi</i>  | <i>M. bovoculi</i> | 2.37              | DSM 21142T LGL | <i>M. bovoculi</i> | DSM 21142T LGL | <i>M. bovoculi</i> | Absent   | Ocular         |
| 68520   | Nebraska  | <i>M. bovoculi</i>  | <i>M. bovoculi</i> | 2.54              | 23343          | <i>M. bovoculi</i> | DSM 21142T LGL | <i>M. bovis</i>    | Absent   | Ocular         |
| 68522   | Nebraska  | <i>M. bovoculi</i>  | <i>M. bovoculi</i> | 2.39              | DSM 21142T LGL | <i>M. bovoculi</i> | DSM 21142T LGL | <i>M. bovoculi</i> | Absent   | Ocular         |
| 68523   | Nebraska  | <i>M. bovoculi</i>  | <i>M. bovoculi</i> | 2.56              | 23343          | <i>M. bovoculi</i> | DSM 21142T LGL | <i>M. bovis</i>    | Absent   | Ocular         |
| 68524   | Nebraska  | <i>M. bovoculi</i>  | <i>M. bovoculi</i> | 2.48              | 23343          | <i>M. bovoculi</i> | DSM 21142T LGL | <i>M. bovis</i>    | Absent   | Ocular         |

| Isolate | State     | Sequencing results* | UNLVDC ID          | UNLVDC top score† | UNLVDC match‡  | BDAL MALDI ID      | BDAL match‡    | PCR-RFLP           | Disease§ | Site of origin |
|---------|-----------|---------------------|--------------------|-------------------|----------------|--------------------|----------------|--------------------|----------|----------------|
| 22581   | Missouri  | <i>M. bovoculi</i>  | <i>M. bovoculi</i> | 2.6               | 23343          | <i>M. bovoculi</i> | DSM 21142T LGL | <i>M. bovis</i>    | Absent   | Nasopharynx    |
| 23343   | Tennessee | <i>M. bovoculi</i>  | <i>M. bovoculi</i> | 2.6               | 23343          | <i>M. bovoculi</i> | DSM 21142T LGL | <i>M. bovis</i>    | Absent   | Nasopharynx    |
| 28389   | Kentucky  | <i>M. bovoculi</i>  | <i>M. bovoculi</i> | 2.55              | 23343          | <i>M. bovoculi</i> | DSM 21142T LGL | <i>M. bovis</i>    | Absent   | Nasopharynx    |
| 33362   | Kansas    | <i>M. bovoculi</i>  | <i>M. bovoculi</i> | 2.58              | 23343          | <i>M. bovoculi</i> | DSM 21142T LGL | <i>M. bovis</i>    | Absent   | Nasopharynx    |
| 57850   | Nebraska  | <i>M. bovoculi</i>  | <i>M. bovoculi</i> | 2.52              | DSM 21142T LGL | <i>M. bovoculi</i> | DSM 21142T LGL | <i>M. bovoculi</i> | Present  | Ocular         |
| 57851   | Montana   | <i>M. bovoculi</i>  | <i>M. bovoculi</i> | 2.42              | DSM 21142T LGL | <i>M. bovoculi</i> | DSM 21142T LGL | <i>M. bovoculi</i> | Present  | Ocular         |
| 57852   | Nebraska  | <i>M. bovoculi</i>  | <i>M. bovoculi</i> | 2.47              | DSM 21142T LGL | <i>M. bovoculi</i> | DSM 21142T LGL | <i>M. bovoculi</i> | Present  | Swab           |
| 57853   | Nebraska  | <i>M. bovoculi</i>  | <i>M. bovoculi</i> | 2.36              | DSM 21142T LGL | <i>M. bovoculi</i> | DSM 21142T LGL | <i>M. bovoculi</i> | Present  | Ocular         |
| 57854   | Nebraska  | <i>M. bovoculi</i>  | <i>M. bovoculi</i> | 2.31              | DSM 21142T LGL | <i>M. bovoculi</i> | DSM 21142T LGL | <i>M. bovoculi</i> | Present  | Ocular         |
| 57855   | Ohio      | <i>M. bovoculi</i>  | <i>M. bovoculi</i> | 2.36              | DSM 21142T LGL | <i>M. bovoculi</i> | DSM 21142T LGL | <i>M. bovoculi</i> | Present  | Ocular         |
| 57857   | Texas     | <i>M. bovoculi</i>  | <i>M. bovoculi</i> | 2.41              | DSM 21142T LGL | <i>M. bovoculi</i> | DSM 21142T LGL | <i>M. bovoculi</i> | Present  | Ocular         |
| 68525   | Nebraska  | <i>M. bovoculi</i>  | <i>M. bovoculi</i> | 2.51              | 23343          | <i>M. bovoculi</i> | DSM 21142T LGL | <i>M. bovis</i>    | Absent   | Ocular         |
| 68527   | Nebraska  | <i>M. bovoculi</i>  | <i>M. bovoculi</i> | 2.5               | DSM 21142T LGL | <i>M. bovoculi</i> | DSM 21142T LGL | <i>M. bovoculi</i> | Absent   | Ocular         |
| 68528   | Nebraska  | <i>M. bovoculi</i>  | <i>M. bovoculi</i> | 2.31              | DSM 21142T LGL | <i>M. bovoculi</i> | DSM 21142T LGL | <i>M. bovoculi</i> | Absent   | Ocular         |
| 68529   | Nebraska  | <i>M. bovoculi</i>  | <i>M. bovoculi</i> | 2.4               | DSM 21142T LGL | <i>M. bovoculi</i> | DSM 21142T LGL | <i>M. bovoculi</i> | Absent   | Ocular         |
| 68530   | Nebraska  | <i>M. bovoculi</i>  | <i>M. bovoculi</i> | 2.5               | DSM 21142T LGL | <i>M. bovoculi</i> | DSM 21142T LGL | <i>M. bovis</i>    | Absent   | Ocular         |
| 68531   | Nebraska  | <i>M. bovoculi</i>  | <i>M. bovoculi</i> | 2.49              | DSM 21142T LGL | <i>M. bovoculi</i> | DSM 21142T LGL | <i>M. bovoculi</i> | Absent   | Ocular         |
| 68532   | Nebraska  | <i>M. bovoculi</i>  | <i>M. bovoculi</i> | 2.47              | DSM 21142T LGL | <i>M. bovoculi</i> | DSM 21142T LGL | <i>M. bovoculi</i> | Absent   | Ocular         |
| 68533   | Nebraska  | <i>M. bovoculi</i>  | <i>M. bovoculi</i> | 2.5               | 23343          | <i>M. bovoculi</i> | DSM 21142T LGL | <i>M. bovis</i>    | Absent   | Ocular         |

| Isolate | State     | Sequencing results* | UNLVDC ID          | UNLVDC top score† | UNLVDC match‡  | BDAL MALDI ID      | BDAL match‡    | PCR-RFLP           | Disease§ | Site of origin |
|---------|-----------|---------------------|--------------------|-------------------|----------------|--------------------|----------------|--------------------|----------|----------------|
| 22581   | Missouri  | <i>M. bovoculi</i>  | <i>M. bovoculi</i> | 2.6               | 23343          | <i>M. bovoculi</i> | DSM 21142T LGL | <i>M. bovis</i>    | Absent   | Nasopharynx    |
| 23343   | Tennessee | <i>M. bovoculi</i>  | <i>M. bovoculi</i> | 2.6               | 23343          | <i>M. bovoculi</i> | DSM 21142T LGL | <i>M. bovis</i>    | Absent   | Nasopharynx    |
| 28389   | Kentucky  | <i>M. bovoculi</i>  | <i>M. bovoculi</i> | 2.55              | 23343          | <i>M. bovoculi</i> | DSM 21142T LGL | <i>M. bovis</i>    | Absent   | Nasopharynx    |
| 33362   | Kansas    | <i>M. bovoculi</i>  | <i>M. bovoculi</i> | 2.58              | 23343          | <i>M. bovoculi</i> | DSM 21142T LGL | <i>M. bovis</i>    | Absent   | Nasopharynx    |
| 57850   | Nebraska  | <i>M. bovoculi</i>  | <i>M. bovoculi</i> | 2.52              | DSM 21142T LGL | <i>M. bovoculi</i> | DSM 21142T LGL | <i>M. bovoculi</i> | Present  | Ocular         |
| 57851   | Montana   | <i>M. bovoculi</i>  | <i>M. bovoculi</i> | 2.42              | DSM 21142T LGL | <i>M. bovoculi</i> | DSM 21142T LGL | <i>M. bovoculi</i> | Present  | Ocular         |
| 57852   | Nebraska  | <i>M. bovoculi</i>  | <i>M. bovoculi</i> | 2.47              | DSM 21142T LGL | <i>M. bovoculi</i> | DSM 21142T LGL | <i>M. bovoculi</i> | Present  | Swab           |
| 57853   | Nebraska  | <i>M. bovoculi</i>  | <i>M. bovoculi</i> | 2.36              | DSM 21142T LGL | <i>M. bovoculi</i> | DSM 21142T LGL | <i>M. bovoculi</i> | Present  | Ocular         |
| 57854   | Nebraska  | <i>M. bovoculi</i>  | <i>M. bovoculi</i> | 2.31              | DSM 21142T LGL | <i>M. bovoculi</i> | DSM 21142T LGL | <i>M. bovoculi</i> | Present  | Ocular         |
| 57855   | Ohio      | <i>M. bovoculi</i>  | <i>M. bovoculi</i> | 2.36              | DSM 21142T LGL | <i>M. bovoculi</i> | DSM 21142T LGL | <i>M. bovoculi</i> | Present  | Ocular         |
| 57857   | Texas     | <i>M. bovoculi</i>  | <i>M. bovoculi</i> | 2.41              | DSM 21142T LGL | <i>M. bovoculi</i> | DSM 21142T LGL | <i>M. bovoculi</i> | Present  | Ocular         |
| 68534   | Nebraska  | <i>M. bovoculi</i>  | <i>M. bovoculi</i> | 2.56              | 23343          | <i>M. bovoculi</i> | DSM 21142T LGL | <i>M. bovis</i>    | Absent   | Ocular         |
| 68535   | Nebraska  | <i>M. bovoculi</i>  | <i>M. bovoculi</i> | 2.51              | 23343          | <i>M. bovoculi</i> | DSM 21142T LGL | <i>M. bovis</i>    | Absent   | Ocular         |
| 68536   | Nebraska  | <i>M. bovoculi</i>  | <i>M. bovoculi</i> | 2.41              | ATCC 19575 New | <i>M. bovoculi</i> | DSM 21142T LGL | <i>M. bovoculi</i> | Absent   | Ocular         |
| 68538   | Nebraska  | <i>M. bovoculi</i>  | <i>M. bovoculi</i> | 2.48              | 23343          | <i>M. bovoculi</i> | DSM 21142T LGL | <i>M. bovis</i>    | Absent   | Ocular         |
| 68539   | Nebraska  | <i>M. bovoculi</i>  | <i>M. bovoculi</i> | 2.46              | 23343          | <i>M. bovoculi</i> | DSM 21142T LGL | <i>M. bovis</i>    | Absent   | Ocular         |
| 68540   | Nebraska  | <i>M. bovoculi</i>  | <i>M. bovoculi</i> | 2.53              | 23343          | <i>M. bovoculi</i> | DSM 21142T LGL | <i>M. bovis</i>    | Absent   | Ocular         |
| 68541   | Nebraska  | <i>M. bovoculi</i>  | <i>M. bovoculi</i> | 2.48              | DSM 21142T LGL | <i>M. bovoculi</i> | DSM 21142T LGL | <i>M. bovoculi</i> | Absent   | Ocular         |
| 68542   | Nebraska  | <i>M. bovoculi</i>  | <i>M. bovoculi</i> | 2.52              | DSM 21142T LGL | <i>M. bovoculi</i> | DSM 21142T LGL | <i>M. bovoculi</i> | Absent   | Ocular         |

| Isolate | State     | Sequencing results* | UNLVDC ID          | UNLVDC top score† | UNLVDC match‡  | BDAL MALDI ID      | BDAL match‡    | PCR-RFLP           | Disease§ | Site of origin |
|---------|-----------|---------------------|--------------------|-------------------|----------------|--------------------|----------------|--------------------|----------|----------------|
| 22581   | Missouri  | <i>M. bovoculi</i>  | <i>M. bovoculi</i> | 2.6               | 23343          | <i>M. bovoculi</i> | DSM 21142T LGL | <i>M. bovis</i>    | Absent   | Nasopharynx    |
| 23343   | Tennessee | <i>M. bovoculi</i>  | <i>M. bovoculi</i> | 2.6               | 23343          | <i>M. bovoculi</i> | DSM 21142T LGL | <i>M. bovis</i>    | Absent   | Nasopharynx    |
| 28389   | Kentucky  | <i>M. bovoculi</i>  | <i>M. bovoculi</i> | 2.55              | 23343          | <i>M. bovoculi</i> | DSM 21142T LGL | <i>M. bovis</i>    | Absent   | Nasopharynx    |
| 33362   | Kansas    | <i>M. bovoculi</i>  | <i>M. bovoculi</i> | 2.58              | 23343          | <i>M. bovoculi</i> | DSM 21142T LGL | <i>M. bovis</i>    | Absent   | Nasopharynx    |
| 57850   | Nebraska  | <i>M. bovoculi</i>  | <i>M. bovoculi</i> | 2.52              | DSM 21142T LGL | <i>M. bovoculi</i> | DSM 21142T LGL | <i>M. bovoculi</i> | Present  | Ocular         |
| 57851   | Montana   | <i>M. bovoculi</i>  | <i>M. bovoculi</i> | 2.42              | DSM 21142T LGL | <i>M. bovoculi</i> | DSM 21142T LGL | <i>M. bovoculi</i> | Present  | Ocular         |
| 57852   | Nebraska  | <i>M. bovoculi</i>  | <i>M. bovoculi</i> | 2.47              | DSM 21142T LGL | <i>M. bovoculi</i> | DSM 21142T LGL | <i>M. bovoculi</i> | Present  | Swab           |
| 57853   | Nebraska  | <i>M. bovoculi</i>  | <i>M. bovoculi</i> | 2.36              | DSM 21142T LGL | <i>M. bovoculi</i> | DSM 21142T LGL | <i>M. bovoculi</i> | Present  | Ocular         |
| 57854   | Nebraska  | <i>M. bovoculi</i>  | <i>M. bovoculi</i> | 2.31              | DSM 21142T LGL | <i>M. bovoculi</i> | DSM 21142T LGL | <i>M. bovoculi</i> | Present  | Ocular         |
| 57855   | Ohio      | <i>M. bovoculi</i>  | <i>M. bovoculi</i> | 2.36              | DSM 21142T LGL | <i>M. bovoculi</i> | DSM 21142T LGL | <i>M. bovoculi</i> | Present  | Ocular         |
| 57857   | Texas     | <i>M. bovoculi</i>  | <i>M. bovoculi</i> | 2.41              | DSM 21142T LGL | <i>M. bovoculi</i> | DSM 21142T LGL | <i>M. bovoculi</i> | Present  | Ocular         |
| 68543   | Nebraska  | <i>M. bovoculi</i>  | <i>M. bovoculi</i> | 2.49              | 23343          | <i>M. bovoculi</i> | DSM 21142T LGL | <i>M. bovis</i>    | Absent   | Ocular         |
| 68544   | Nebraska  | <i>M. bovoculi</i>  | <i>M. bovoculi</i> | 2.6               | 23343          | <i>M. bovoculi</i> | DSM 21142T LGL | <i>M. bovis</i>    | Absent   | Ocular         |
| 68545   | Nebraska  | <i>M. bovoculi</i>  | <i>M. bovoculi</i> | 2.48              | 23343          | <i>M. bovoculi</i> | DSM 21142T LGL | <i>M. bovis</i>    | Absent   | Ocular         |
| 68546   | Nebraska  | <i>M. bovoculi</i>  | <i>M. bovoculi</i> | 2.39              | 23343          | <i>M. bovoculi</i> | DSM 21142T LGL | <i>M. bovis</i>    | Absent   | Ocular         |
| 68547   | Nebraska  | <i>M. bovoculi</i>  | <i>M. bovoculi</i> | 2.47              | 23343          | <i>M. bovoculi</i> | DSM 21142T LGL | <i>M. bovis</i>    | Absent   | Ocular         |
| 68549   | Nebraska  | <i>M. bovoculi</i>  | <i>M. bovoculi</i> | 2.59              | 23343          | <i>M. bovoculi</i> | DSM 21142T LGL | <i>M. bovis</i>    | Absent   | Ocular         |
| 68551   | Nebraska  | <i>M. bovoculi</i>  | <i>M. bovoculi</i> | 2.48              | DSM 21142T LGL | <i>M. bovoculi</i> | DSM 21142T LGL | <i>M. bovoculi</i> | Absent   | Ocular         |
| 68552   | Nebraska  | <i>M. bovoculi</i>  | <i>M. bovoculi</i> | 2.44              | DSM 21142T LGL | <i>M. bovoculi</i> | DSM 21142T LGL | <i>M. bovoculi</i> | Absent   | Ocular         |

| Isolate | State     | Sequencing results* | UNLVDC ID          | UNLVDC top score† | UNLVDC match‡  | BDAL MALDI ID                  | BDAL match‡    | PCR-RFLP           | Disease§ | Site of origin |
|---------|-----------|---------------------|--------------------|-------------------|----------------|--------------------------------|----------------|--------------------|----------|----------------|
| 22581   | Missouri  | <i>M. bovoculi</i>  | <i>M. bovoculi</i> | 2.6               | 23343          | <i>M. bovoculi</i>             | DSM 21142T LGL | <i>M. bovis</i>    | Absent   | Nasopharynx    |
| 23343   | Tennessee | <i>M. bovoculi</i>  | <i>M. bovoculi</i> | 2.6               | 23343          | <i>M. bovoculi</i>             | DSM 21142T LGL | <i>M. bovis</i>    | Absent   | Nasopharynx    |
| 28389   | Kentucky  | <i>M. bovoculi</i>  | <i>M. bovoculi</i> | 2.55              | 23343          | <i>M. bovoculi</i>             | DSM 21142T LGL | <i>M. bovis</i>    | Absent   | Nasopharynx    |
| 33362   | Kansas    | <i>M. bovoculi</i>  | <i>M. bovoculi</i> | 2.58              | 23343          | <i>M. bovoculi</i>             | DSM 21142T LGL | <i>M. bovis</i>    | Absent   | Nasopharynx    |
| 57850   | Nebraska  | <i>M. bovoculi</i>  | <i>M. bovoculi</i> | 2.52              | DSM 21142T LGL | <i>M. bovoculi</i>             | DSM 21142T LGL | <i>M. bovoculi</i> | Present  | Ocular         |
| 57851   | Montana   | <i>M. bovoculi</i>  | <i>M. bovoculi</i> | 2.42              | DSM 21142T LGL | <i>M. bovoculi</i>             | DSM 21142T LGL | <i>M. bovoculi</i> | Present  | Ocular         |
| 57852   | Nebraska  | <i>M. bovoculi</i>  | <i>M. bovoculi</i> | 2.47              | DSM 21142T LGL | <i>M. bovoculi</i>             | DSM 21142T LGL | <i>M. bovoculi</i> | Present  | Swab           |
| 57853   | Nebraska  | <i>M. bovoculi</i>  | <i>M. bovoculi</i> | 2.36              | DSM 21142T LGL | <i>M. bovoculi</i>             | DSM 21142T LGL | <i>M. bovoculi</i> | Present  | Ocular         |
| 57854   | Nebraska  | <i>M. bovoculi</i>  | <i>M. bovoculi</i> | 2.31              | DSM 21142T LGL | <i>M. bovoculi</i>             | DSM 21142T LGL | <i>M. bovoculi</i> | Present  | Ocular         |
| 57855   | Ohio      | <i>M. bovoculi</i>  | <i>M. bovoculi</i> | 2.36              | DSM 21142T LGL | <i>M. bovoculi</i>             | DSM 21142T LGL | <i>M. bovoculi</i> | Present  | Ocular         |
| 57857   | Texas     | <i>M. bovoculi</i>  | <i>M. bovoculi</i> | 2.41              | DSM 21142T LGL | <i>M. bovoculi</i>             | DSM 21142T LGL | <i>M. bovoculi</i> | Present  | Ocular         |
| 68554   | Nebraska  | <i>M. bovoculi</i>  | <i>M. bovoculi</i> | 2.44              | DSM 21142T LGL | <i>M. bovoculi</i>             | DSM 21142T LGL | <i>M. bovoculi</i> | Absent   | Ocular         |
| 68555   | Nebraska  | <i>M. bovoculi</i>  | <i>M. bovoculi</i> | 2.4               | DSM 21142T LGL | <i>M. bovoculi</i>             | DSM 21142T LGL | <i>M. bovoculi</i> | Absent   | Ocular         |
| 58069   | Nebraska  | <i>M. bovoculi</i>  | <i>M. bovoculi</i> | 2.59              | DSM 21142T LGL | <i>M. bovoculi</i>             | DSM 21142T LGL | <i>M. bovoculi</i> | Present  | Ocular         |
| 58086   | Virginia  | <i>M. bovoculi</i>  | <i>M. bovoculi</i> | 2.38              | DSM 21142T LGL | <i>M. bovoculi</i>             | DSM 21142T LGL | <i>M. bovoculi</i> | Present  | Ocular         |
| 68493   | Nebraska  | <i>M. bovis</i>     | <i>M. bovis</i>    | 2.53              | 2017003602-1   | <i>Branhamella catarrhalis</i> | RVA2 98 CHB    | <i>M. bovis</i>    | Absent   | Ocular         |
| 68494   | Nebraska  | <i>M. bovis</i>     | <i>M. bovis</i>    | 2.62              | 2017003602-1   | <i>B. catarrhalis</i>          | RVA2 98 CHB    | <i>M. bovis</i>    | Absent   | Ocular         |
| 68509   | Nebraska  | <i>M. bovis</i>     | <i>M. bovis</i>    | 2.47              | GD56 GDD       | <i>M. bovis</i>                | GD56 GDD       | <i>M. bovis</i>    | Absent   | Ocular         |
| 68521   | Nebraska  | <i>M. bovis</i>     | <i>M. bovis</i>    | 2.43              | GD56 GDD       | <i>M. bovis</i>                | GD56 GDD       | <i>M. bovis</i>    | Absent   | Ocular         |
| 68550   | Nebraska  | <i>M. bovis</i>     | <i>M. bovis</i>    | 1.97              | GD56 GDD       | <i>M. bovis</i>                | GD56 GDD       | <i>M. bovis</i>    | Absent   | Ocular         |

| Isolate | State     | Sequencing results* | UNLVDC ID          | UNLVDC top score† | UNLVDC match‡  | BDAL MALDI ID                       | BDAL match‡    | PCR-RFLP           | Disease§ | Site of origin |
|---------|-----------|---------------------|--------------------|-------------------|----------------|-------------------------------------|----------------|--------------------|----------|----------------|
| 22581   | Missouri  | <i>M. bovoculi</i>  | <i>M. bovoculi</i> | 2.6               | 23343          | <i>M. bovoculi</i>                  | DSM 21142T LGL | <i>M. bovis</i>    | Absent   | Nasopharynx    |
| 23343   | Tennessee | <i>M. bovoculi</i>  | <i>M. bovoculi</i> | 2.6               | 23343          | <i>M. bovoculi</i>                  | DSM 21142T LGL | <i>M. bovis</i>    | Absent   | Nasopharynx    |
| 28389   | Kentucky  | <i>M. bovoculi</i>  | <i>M. bovoculi</i> | 2.55              | 23343          | <i>M. bovoculi</i>                  | DSM 21142T LGL | <i>M. bovis</i>    | Absent   | Nasopharynx    |
| 33362   | Kansas    | <i>M. bovoculi</i>  | <i>M. bovoculi</i> | 2.58              | 23343          | <i>M. bovoculi</i>                  | DSM 21142T LGL | <i>M. bovis</i>    | Absent   | Nasopharynx    |
| 57850   | Nebraska  | <i>M. bovoculi</i>  | <i>M. bovoculi</i> | 2.52              | DSM 21142T LGL | <i>M. bovoculi</i>                  | DSM 21142T LGL | <i>M. bovoculi</i> | Present  | Ocular         |
| 57851   | Montana   | <i>M. bovoculi</i>  | <i>M. bovoculi</i> | 2.42              | DSM 21142T LGL | <i>M. bovoculi</i>                  | DSM 21142T LGL | <i>M. bovoculi</i> | Present  | Ocular         |
| 57852   | Nebraska  | <i>M. bovoculi</i>  | <i>M. bovoculi</i> | 2.47              | DSM 21142T LGL | <i>M. bovoculi</i>                  | DSM 21142T LGL | <i>M. bovoculi</i> | Present  | Swab           |
| 57853   | Nebraska  | <i>M. bovoculi</i>  | <i>M. bovoculi</i> | 2.36              | DSM 21142T LGL | <i>M. bovoculi</i>                  | DSM 21142T LGL | <i>M. bovoculi</i> | Present  | Ocular         |
| 57854   | Nebraska  | <i>M. bovoculi</i>  | <i>M. bovoculi</i> | 2.31              | DSM 21142T LGL | <i>M. bovoculi</i>                  | DSM 21142T LGL | <i>M. bovoculi</i> | Present  | Ocular         |
| 57855   | Ohio      | <i>M. bovoculi</i>  | <i>M. bovoculi</i> | 2.36              | DSM 21142T LGL | <i>M. bovoculi</i>                  | DSM 21142T LGL | <i>M. bovoculi</i> | Present  | Ocular         |
| 57857   | Texas     | <i>M. bovoculi</i>  | <i>M. bovoculi</i> | 2.41              | DSM 21142T LGL | <i>M. bovoculi</i>                  | DSM 21142T LGL | <i>M. bovoculi</i> | Present  | Ocular         |
| 68553   | Nebraska  | <i>M. bovis</i>     | <i>M. bovis</i>    | 2.39              | 2017003602-1   | <i>Acinetobacter radioresistens</i> | LMG 10615 LMG  | <i>M. bovis</i>    | Absent   | Ocular         |
| 68556   | Nebraska  | <i>M. bovis</i>     | <i>M. bovis</i>    | 1.74              | GD56 GDD       | <i>M. bovis</i>                     | GD56 GDD       | <i>M. bovis</i>    | Absent   | Ocular         |
| 57929   | Ohio      | <i>M. bovis</i>     | <i>M. bovis</i>    | 2.48              | 2017003602-1   | <i>A. radioresistens</i>            | B381 UFL       | <i>M. bovis</i>    | Present  | Ocular         |
| 57938   | Nebraska  | <i>M. bovis</i>     | <i>M. bovis</i>    | 2.56              | 2017003602-1   | <i>Lactobacillus sharpeae</i>       | DSM 20506 DSM  | <i>M. bovis</i>    | Present  | Ocular         |
| 57941   | Nebraska  | <i>M. bovis</i>     | <i>M. bovis</i>    | 2.64              | 2017003602-1   | <i>Pseudomonas agarici</i>          | DSM 11810T HAM | <i>M. bovis</i>    | Present  | Ocular         |
| 57974   | Nebraska  | <i>M. bovis</i>     | <i>M. bovis</i>    | 2.35              | 2017003602-1   | <i>Prevotella denticola</i>         | ENR 0191 ENR   | <i>M. bovis</i>    | Present  | Ocular         |
| 57980   | Nebraska  | <i>M. bovis</i>     | <i>M. bovis</i>    | 2.44              | GD56 GDD       | <i>M bovis</i>                      | GD56 GDD       | <i>M. bovoculi</i> | Present  | Ocular         |
| 57981   | Nebraska  | <i>M. bovis</i>     | <i>M. bovis</i>    | 2.62              | 2017003602-1   | <i>Pseudomonas nitroreducens</i>    | DSM 14399T HAM | <i>M. bovoculi</i> | Present  | Ocular         |



| Isolate | State     | Sequencing results* | UNLVDC ID                    | UNLVDC top score† | UNLVDC match‡  | BDAL MALDI ID                | BDAL match‡      | PCR-RFLP           | Disease§ | Site of origin |
|---------|-----------|---------------------|------------------------------|-------------------|----------------|------------------------------|------------------|--------------------|----------|----------------|
| 22581   | Missouri  | <i>M. bovoculi</i>  | <i>M. bovoculi</i>           | 2.6               | 23343          | <i>M. bovoculi</i>           | DSM 21142T LGL   | <i>M. bovis</i>    | Absent   | Nasopharynx    |
| 23343   | Tennessee | <i>M. bovoculi</i>  | <i>M. bovoculi</i>           | 2.6               | 23343          | <i>M. bovoculi</i>           | DSM 21142T LGL   | <i>M. bovis</i>    | Absent   | Nasopharynx    |
| 28389   | Kentucky  | <i>M. bovoculi</i>  | <i>M. bovoculi</i>           | 2.55              | 23343          | <i>M. bovoculi</i>           | DSM 21142T LGL   | <i>M. bovis</i>    | Absent   | Nasopharynx    |
| 33362   | Kansas    | <i>M. bovoculi</i>  | <i>M. bovoculi</i>           | 2.58              | 23343          | <i>M. bovoculi</i>           | DSM 21142T LGL   | <i>M. bovis</i>    | Absent   | Nasopharynx    |
| 57850   | Nebraska  | <i>M. bovoculi</i>  | <i>M. bovoculi</i>           | 2.52              | DSM 21142T LGL | <i>M. bovoculi</i>           | DSM 21142T LGL   | <i>M. bovoculi</i> | Present  | Ocular         |
| 57851   | Montana   | <i>M. bovoculi</i>  | <i>M. bovoculi</i>           | 2.42              | DSM 21142T LGL | <i>M. bovoculi</i>           | DSM 21142T LGL   | <i>M. bovoculi</i> | Present  | Ocular         |
| 57852   | Nebraska  | <i>M. bovoculi</i>  | <i>M. bovoculi</i>           | 2.47              | DSM 21142T LGL | <i>M. bovoculi</i>           | DSM 21142T LGL   | <i>M. bovoculi</i> | Present  | Swab           |
| 57853   | Nebraska  | <i>M. bovoculi</i>  | <i>M. bovoculi</i>           | 2.36              | DSM 21142T LGL | <i>M. bovoculi</i>           | DSM 21142T LGL   | <i>M. bovoculi</i> | Present  | Ocular         |
| 57854   | Nebraska  | <i>M. bovoculi</i>  | <i>M. bovoculi</i>           | 2.31              | DSM 21142T LGL | <i>M. bovoculi</i>           | DSM 21142T LGL   | <i>M. bovoculi</i> | Present  | Ocular         |
| 57855   | Ohio      | <i>M. bovoculi</i>  | <i>M. bovoculi</i>           | 2.36              | DSM 21142T LGL | <i>M. bovoculi</i>           | DSM 21142T LGL   | <i>M. bovoculi</i> | Present  | Ocular         |
| 57857   | Texas     | <i>M. bovoculi</i>  | <i>M. bovoculi</i>           | 2.41              | DSM 21142T LGL | <i>M. bovoculi</i>           | DSM 21142T LGL   | <i>M. bovoculi</i> | Present  | Ocular         |
| 57989   | Florida   | <i>M. bovis</i>     | <i>M. bovis</i>              | 2.49              | GD56 GDD       | <i>M. bovis</i>              | GD56 GDD         | <i>M. bovoculi</i> | Present  | Ocular         |
| 57997   | Nebraska  | <i>M. bovis</i>     | <i>M. bovis</i>              | 2.55              | 2017003602-1   | <i>Clostridium spirofome</i> | 1047 NCTC 11211T | <i>M. species</i>  | Present  | Ocular         |
| 58098   | Virginia  | <i>M. bovis</i>     | <i>M. bovis</i>              | 2.7               | 2017003602-1   | <i>Lactobacillus oris</i>    | DSM 4865 DSM     | <i>M. bovoculi</i> | Present  | Ocular         |
| 57868   | Nebraska  | <i>M. bovis</i>     | <i>M. bovis</i>              | 1.99              | GD56 GDD       | <i>M. bovis</i>              | GD56 GDD         | <i>M. bovoculi</i> | Present  | Ocular         |
| 57966   | Nebraska  | <i>M. bovis</i>     | <i>Acinetobacter lwoffii</i> | 1.72              | 2403T DSM      | <i>A. lwoffii</i>            | DSM 2403T DSM    | <i>M. bovis</i>    | Present  | Ocular         |

BDAL= Bruker Daltonics (manufacturer) database; UNLVDC= University of Nebraska–Lincoln Veterinary Diagnostic Center (manufacturer + customized) database.

\* Whole genome sequencing (*M. bovoculi*) or 16S ribosomal DNA sequencing (*M. bovis*).

† The matching score with the top matching reference mass spectra (MSP; UNLVDC match).

‡ Highest matching reference MSP in either the UNLVDC or BDAL library.

§ Isolate was recovered from an animal without infectious bovine keratoconjunctivitis (IBK; Absent) or from an animal submitted as part of a diagnostic submission for IBK (Present).
